# Supplementary material for: Glycosyl oxazolines serve as active donors for iterative synthesis of type I oligosaccharides
Source: Royal Society of Chemistry journal article supplement (doi:10.1039/d4cc03247k), 2024-01-01
Supplement: d4cc03247k1.pdf [file d4cc03247k1.pdf]

Supporting Information

For

**Glycosyl Oxazolines Serve as Active Donors for Iterative Synthesis of  
Type I Oligosaccharides**

Nitish Verma,<sup>a,b,c</sup> Zhijay Tu,<sup>a</sup> Septila Renata,<sup>a,c,d</sup> and Chun-Hung Lin<sup>a,c,e,\*</sup>

<sup>a</sup>Institute of Biological Chemistry, Academia Sinica, No. 128, Academia Road, Section 2, Nankang, Taipei 11529, Taiwan

<sup>b</sup>Department of Chemistry, National Tsing Hua University, Taiwan

<sup>c</sup>Chemical Biology and Molecular Biophysics, Taiwan International Graduate Program, Academia Sinica, Taiwan

<sup>d</sup>Institute of Bioinformatics and Structural Biology, College of Life Science, National Tsing Hua University, Taiwan

<sup>e</sup>Department of Chemistry and Institute of Biochemical Sciences, National Taiwan University, Taiwan

\*Corresponding author E-mail: [chunhung@gate.sinica.edu.tw](mailto:chunhung@gate.sinica.edu.tw)

## Table of Contents

|                                                                                                                                                                                                       |       |
|-------------------------------------------------------------------------------------------------------------------------------------------------------------------------------------------------------|-------|
| <b>I. Supporting Tables, Schemes, and Figures</b> .....                                                                                                                                               | S1    |
| <b>Table S1. Synthesis of Type I LacNAc Disaccharide Oxazoline 2</b> .....                                                                                                                            | S1    |
| <b>Table S2. Glycosylation of Oxazoline Donors with Cyclohexanol by Using Different Promoters</b> .....                                                                                               | S1-S2 |
| <b>Table S3. Glycosylations of Oxazoline 2 with Disaccharide Acceptors 3–5</b> .....                                                                                                                  | S3    |
| <b>Table S4. Glycosylation of <i>in situ</i> Oxazoline 2 with Acceptor 5 (by Quench and Workup Method)</b> .....                                                                                      | S4    |
| <b>Table S5. Formation of Oxazoline 9 under Various Conditions</b> .....                                                                                                                              | S5    |
| <b>Table S6. Synthesis of Type I LacNAc Hexasaccharide Oxazoline 11</b> .....                                                                                                                         | S6    |
| <b>Scheme S1. Synthesis of Disaccharide Oxazoline 2b</b> .....                                                                                                                                        | S7    |
| <b>Scheme S2. Improved Synthesis of Hexasaccharide 15 by Oxazoline Based Approach</b> ..                                                                                                              | S7    |
| <b>Scheme S3. Scheme Showing the Calculation of Overall Yield of Octasaccharide 12</b> .....                                                                                                          | S7    |
| <b>Figure S1. Formation of Di-, Tetra-, and Hexasaccharide Oxazolines (2, 9, and 11) were Confirmed by <sup>1</sup>H NMR of Crude Reaction Mixtures</b> .....                                         | S8    |
| <b>II. Experimental Procedures</b> .....                                                                                                                                                              | S9    |
| <b>General experimental procedure</b> .....                                                                                                                                                           | S9    |
| <b>General procedure to synthesize di- (2) and tetrasaccharide (9) oxazoline donors by Ph<sub>2</sub>SO/Tf<sub>2</sub>O method (entries 1-3, Table S1; and entry 1, Table S5)</b> .....               | S9    |
| <b>General procedure to synthesize di- (2), tetra- (9), and hexasaccharide (11) oxazoline donors by NIS/TMSOTf method (entry 4, Table S1; entries 2-9, Table S5; and entries 1-3, Table S6)</b> ..... | S10   |
| <b>General procedure for glycosylation of disaccharide oxazoline 2 with cyclohexanol by using different promoters (entries 1-12, Table S2)</b> .....                                                  | S10   |
| <b>General procedure for glycosylation of disaccharide oxazoline 2b with cyclohexanol by using different promoters (entries 13-19, Table S2)</b> .....                                                | S10   |
| <b>General procedure for [2 + 2] glycosylations between disaccharide oxazoline donor 2 and thioglycoside acceptors (3-5) (Table S3)</b> .....                                                         | S11   |
| <b>Reaction procedures of [2 + 2] glycosylations between disaccharide oxazoline donor 2 and thioglycoside acceptor 5 by quench and workup method (Table S4)</b> .....                                 | S12   |
| <b>Reference</b> .....                                                                                                                                                                                | S24   |
| <b>III. NMR Spectra</b> .....                                                                                                                                                                         | S25   |
| <sup>1</sup> H NMR spectrum of compound 2a .....                                                                                                                                                      | S25   |

|                                                                                  |     |
|----------------------------------------------------------------------------------|-----|
| <sup>13</sup> C NMR spectrum of compound <b>2a</b> .....                         | S25 |
| <sup>1</sup> H NMR spectrum of compound <b>2b</b> .....                          | S26 |
| <sup>13</sup> C NMR spectrum of compound <b>2b</b> .....                         | S26 |
| <sup>1</sup> H NMR spectrum of compound <b>2c</b> .....                          | S27 |
| <sup>13</sup> C NMR spectrum of compound <b>2c</b> .....                         | S27 |
| <sup>1</sup> H NMR spectrum of compound <b>8a</b> .....                          | S28 |
| <sup>13</sup> C NMR spectrum of compound <b>8a</b> .....                         | S28 |
| <sup>1</sup> H NMR spectrum of compound <b>9</b> .....                           | S29 |
| <sup>13</sup> C NMR spectrum of compound <b>9</b> .....                          | S29 |
| <sup>1</sup> H NMR spectrum of compound <b>10</b> .....                          | S30 |
| <sup>13</sup> C NMR spectrum of compound <b>10</b> .....                         | S30 |
| 1D-Selective TOCSY NMR spectrum of compound <b>10</b> .....                      | S31 |
| 1D-Selective TOCSY NMR spectrum of compound <b>10</b> .....                      | S31 |
| <sup>1</sup> H- <sup>1</sup> H 2D COSY NMR spectrum of compound <b>10</b> .....  | S32 |
| <sup>1</sup> H- <sup>1</sup> H 2D COSY NMR spectrum of compound <b>10</b> .....  | S32 |
| <sup>1</sup> H- <sup>1</sup> H 2D COSY NMR spectrum of compound <b>10</b> .....  | S33 |
| <sup>1</sup> H- <sup>13</sup> C 2D HMQC NMR spectrum of compound <b>10</b> ..... | S33 |
| <sup>1</sup> H- <sup>13</sup> C 2D HMBC NMR spectrum of compound <b>10</b> ..... | S34 |
| <sup>1</sup> H NMR spectrum of compound <b>11</b> .....                          | S35 |
| <sup>13</sup> C NMR spectrum of compound <b>11</b> .....                         | S35 |
| <sup>1</sup> H NMR spectrum of compound <b>12</b> .....                          | S36 |
| <sup>13</sup> C NMR spectrum of compound <b>12</b> .....                         | S36 |
| <sup>1</sup> H- <sup>1</sup> H 2D COSY NMR spectrum of compound <b>12</b> .....  | S37 |
| <sup>1</sup> H- <sup>13</sup> C 2D HMQC NMR spectrum of compound <b>12</b> ..... | S37 |
| <sup>1</sup> H- <sup>13</sup> C 2D HMBC NMR spectrum of compound <b>12</b> ..... | S38 |

## I. Supporting Tables, Schemes, and Figures

**Table S1.** Synthesis of Type I LacNAc Disaccharide Oxazoline **2**

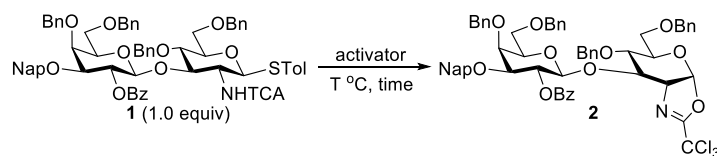

| entry | activator (equiv)                                                | T (°C) | time   | yield <sup>a</sup> (%) of <b>2</b> |
|-------|------------------------------------------------------------------|--------|--------|------------------------------------|
| 1     | Ph <sub>2</sub> SO (0.5), Tf <sub>2</sub> O (0.5), TTBP (1.14)   | -60    | 1 h    | 90                                 |
| 2     | Ph <sub>2</sub> SO (0.65), Tf <sub>2</sub> O (0.65), TTBP (1.14) | -60    | 1 h    | 100                                |
| 3     | Ph <sub>2</sub> SO (0.65), Tf <sub>2</sub> O (0.65)              | -60    | 1 h    | 93                                 |
| 4     | NIS (1.2), TMSOTf (0.2)                                          | -50    | 15 min | 100                                |

Activation conditions: Activator, 3 Å mol. sieves (2-fold amount of **1** by wt/wt), CH<sub>2</sub>Cl<sub>2</sub> (60 mM). <sup>a</sup>NMR yield, calculated by using dimethyl terephthalate as internal standard.

**Table S2.** Glycosylation of Oxazoline Donors (1.0 equiv) with Cyclohexanol (1.2 equiv) in CH<sub>2</sub>Cl<sub>2</sub> by Using Different Promoters

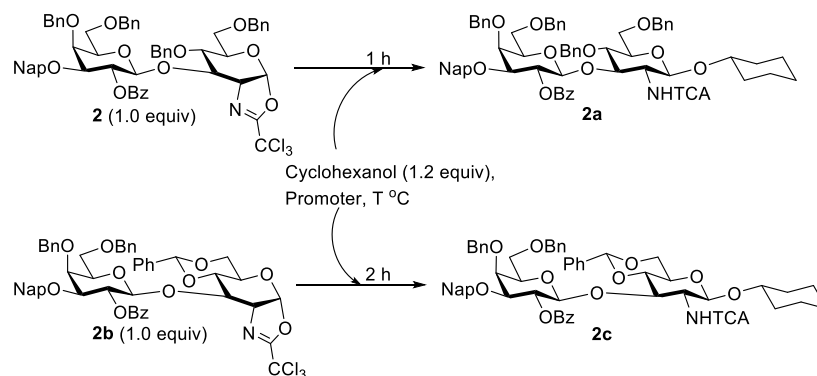

**Table S2.** (Continued)

| entry | oxazoline | promoter<br>(0.2 equiv)             | T<br>(°C) | product (%<br>yield) <sup>a</sup> |
|-------|-----------|-------------------------------------|-----------|-----------------------------------|
| 1     | <b>2</b>  | TfOH                                | -50       | <b>2a</b> (90)                    |
| 2     | <b>2</b>  | Tf <sub>2</sub> NH                  | -50       | <b>2a</b> (86)                    |
| 3     | <b>2</b>  | TMSOTf                              | -50       | <b>2a</b> (94)                    |
| 4     | <b>2</b>  | Cu(OTf) <sub>2</sub> <sup>a,b</sup> | -50       | <b>2a</b> (trace)                 |
| 5     | <b>2</b>  | Cu(OTf) <sub>2</sub> <sup>b</sup>   | -20       | <b>2a</b> (trace)                 |
| 6     | <b>2</b>  | In(OTf) <sub>3</sub>                | -50       | <b>2a</b> (24 <sup>e</sup> )      |
| 7     | <b>2</b>  | Sm(OTf) <sub>3</sub>                | -50       | no reaction                       |
| 8     | <b>2</b>  | Sn(OTf) <sub>2</sub>                | -50       | <b>2a</b> (90)                    |
| 9     | <b>2</b>  | Hf(OTf) <sub>4</sub>                | -50       | <b>2a</b> (86)                    |
| 10    | <b>2</b>  | AuCl <sub>3</sub>                   | -50       | no reaction                       |
| 11    | <b>2</b>  | AlCl <sub>3</sub>                   | -50       | <b>2a</b> (trace)                 |
| 12    | <b>2</b>  | FeCl <sub>3</sub>                   | -50       | <b>2a</b> (46 <sup>d</sup> )      |
| 13    | <b>2b</b> | TfOH                                | -50       | <b>2c</b> (64 <sup>e</sup> )      |
| 14    | <b>2b</b> | Tf <sub>2</sub> NH                  | -50       | <b>2c</b> (81)                    |
| 15    | <b>2b</b> | TMSOTf                              | -50       | <b>2c</b> (71 <sup>f</sup> )      |
| 16    | <b>2b</b> | Cu(OTf) <sub>2</sub>                | -50       | <b>2c</b> (trace)                 |
| 17    | <b>2b</b> | In(OTf) <sub>3</sub>                | -50       | <b>2c</b> (trace)                 |
| 18    | <b>2b</b> | Sn(OTf) <sub>2</sub>                | -50       | <b>2c</b> (74)                    |
| 19    | <b>2b</b> | Hf(OTf) <sub>4</sub>                | -50       | <b>2c</b> (55 <sup>g</sup> )      |

<sup>a</sup>NMR yield, calculated by using dimethyl terephthalate as internal standard, promoter was added by using dilution method (diluted with ACN). <sup>b</sup>Promoter was weighed in eppendorf, and poured into the rxn. mixture directly. <sup>c</sup>68% of **2** was unreacted. <sup>d</sup>46% of **2** was unreacted. <sup>e</sup>18% of **2b** was unreacted. <sup>f</sup>14% of **2b** was unreacted. <sup>g</sup>37% of **2b** was unreacted.

**Table S3.** Glycosylations of Oxazoline 2 with Disaccharide Acceptors 3–5 <sup>a</sup>

| entry          | donor (equiv) | acceptor | T (°C) | time (h) | product (% yield) <sup>b</sup> |
|----------------|---------------|----------|--------|----------|--------------------------------|
| 1              | 2 (1.3)       | 3        | −60    | 1.5      | 6 (84)                         |
| 2              | 2 (1.3)       | 4        | −60    | 1.5      | 7 (55)                         |
| 3              | 2 (1.3)       | 4        | −50    | 1.5      | 7 (61) <sup>c</sup>            |
| 4              | 2 (1.3)       | 5        | −60    | 1        | 8 (75)                         |
| 5              | 2 (1.1)       | 5        | −60    | 1        | 8 (70)                         |
| 6              | 2 (1.1)       | 5        | −60    | 2        | 8 (87) <sup>c,d</sup>          |
| 7              | 2 (1.1)       | 5        | −70    | 2        | 8 (84)                         |
| 8              | 2 (1.1)       | 5        | −50    | 2        | 8 (87)                         |
| 9 <sup>a</sup> | 2 (1.1)       | 5        | −50    | 2        | 8 (84)                         |

<sup>a</sup>The reactions were performed in CH<sub>2</sub>Cl<sub>2</sub> with an acceptor (1.0 equiv, 0.04 mmol, 40 mg) and TMSOTf (0.2 equiv), except for entry 9, in which 0.1 equiv of TMSOTf was present. <sup>b</sup>Isolated yield. <sup>c</sup>Please also refer to Scheme 1. <sup>d</sup>The reaction was also done with 0.72 mmol (0.76 g) of 5.

**Table S4.** Glycosylation of *in situ* Oxazoline **2** with Acceptor **5** (by Quench and Workup Method)<sup>a</sup>

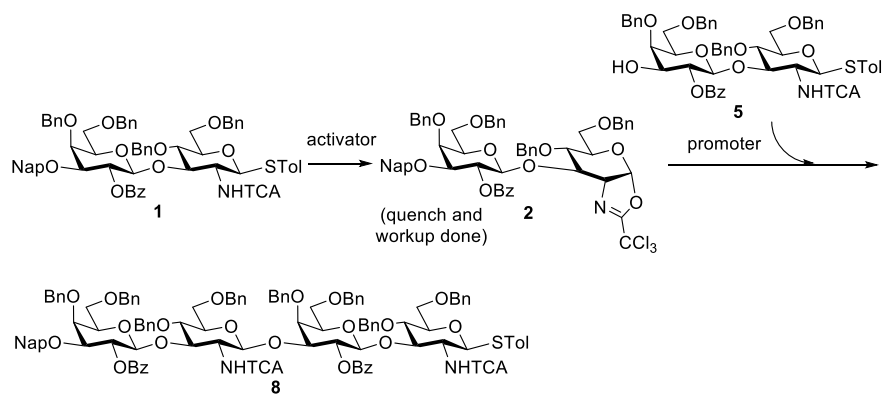

| entry | donor (equiv)  | activator (equiv)                                                | promoter (equiv) | T (°C)           |                  | time (h)         |                 | yield <sup>b</sup> (%) of <b>8</b> |
|-------|----------------|------------------------------------------------------------------|------------------|------------------|------------------|------------------|-----------------|------------------------------------|
| 1     | <b>1</b> (1.1) | Ph <sub>2</sub> SO (0.72), Tf <sub>2</sub> O (0.72), TTBP (1.25) | TMSOTf (1.4)     | -60 <sup>c</sup> | -60 <sup>d</sup> | 1 <sup>c</sup>   | 10 <sup>d</sup> | 58                                 |
| 2     | <b>1</b> (1.1) | NIS (1.3), TMSOTf (0.2)                                          | TMSOTf (0.2)     | -50 <sup>c</sup> | -60 <sup>d</sup> | 0.5 <sup>c</sup> | 2 <sup>d</sup>  | 70                                 |
| 3     | <b>1</b> (1.4) | NIS (1.6), TMSOTf (0.2)                                          | TMSOTf (0.2)     | -50 <sup>c</sup> | -60 <sup>d</sup> | 0.5 <sup>c</sup> | 2 <sup>d</sup>  | 74                                 |

<sup>a</sup> The reaction was carried out in CH<sub>2</sub>Cl<sub>2</sub> with 1.1 equiv of donor **1**, 1 equiv of acceptor **5**, and activator and promoter (both as indicated in the table). <sup>b</sup> Isolated yield. <sup>c</sup> Step 1: oxazoline formation. <sup>d</sup> Step 2: glycosylation between crude oxazoline **2** and acceptor **5**.

**Table S5.** Activation of **8** (60–100mM) to Form Oxazoline **9** in CH<sub>2</sub>Cl<sub>2</sub> under Various Conditions.

| entry | activator (equiv)                                                      | (wt of 3 Å mol. sieves)/(wt of <b>8</b> ) | [ <b>8</b> ] (mM) | T (°C)                  | time   | yield <sup>a</sup> (%) of <b>9</b> |
|-------|------------------------------------------------------------------------|-------------------------------------------|-------------------|-------------------------|--------|------------------------------------|
| 1     | Ph <sub>2</sub> SO (0.65), Tf <sub>2</sub> O (1.3) <sup>b</sup> , TTBP | 2                                         | 60                | –60                     | 6 h    | 45                                 |
| 2     | NIS (1.2), TMSOTf (0.2)                                                | 2                                         | 60                | –50                     | 20 min | 42                                 |
| 3     | NIS (1.2), TMSOTf (0.1)                                                | 2                                         | 60                | –50                     | 20 min | 55                                 |
| 4     | NIS (1.2), TMSOTf (0.1)                                                | 2                                         | 60                | –60                     | 1.5 h  | 87                                 |
| 5     | NIS (1.2), TMSOTf (0.1)                                                | 2                                         | 60                | –70                     | 1.5 h  | 63                                 |
| 6     | NIS (1.2), TMSOTf (0.1)                                                | 4                                         | 60                | –70                     | 1.5 h  | 46 <sup>c</sup>                    |
| 7     | NIS (1.2), TMSOTf (0.1)                                                | 4                                         | 60                | –70                     | 2.5 h  | 74                                 |
| 8     | NIS (1.2), TMSOTf (0.1)                                                | 4                                         | 100               | –70                     | 2.5 h  | 76                                 |
| 9     | NIS (1.2), TMSOTf (0.1)                                                | 4                                         | 100               | –70 to –50 <sup>d</sup> | 2.5 h  | 82                                 |

<sup>a</sup>NMR yield, calculated by using dimethyl terephthalate as the internal standard. <sup>b</sup>Half of the total Tf<sub>2</sub>O (0.65 equiv) was added initially, and another 0.65 equiv of Tf<sub>2</sub>O was added 3.75 h later. <sup>c</sup>21% of **8** remained unreacted. <sup>d</sup>Reaction was stirred at –70, –60, and –50 °C for 50 min at each stage.



**Table S6.** Synthesis of Type I LacNAc Hexasaccharide Oxazoline **11**

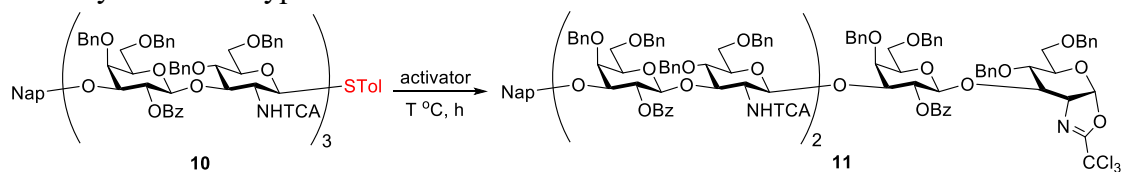

| entry | T (°C) | time  | yield <sup>a</sup> (%) of <b>11</b> |
|-------|--------|-------|-------------------------------------|
| 1     | -70    | 2.5 h | 50 <sup>b</sup>                     |
| 2     | -70    | 3.5 h | 53                                  |
| 3     | -50    | 1 h   | 67                                  |

Activation conditions: NIS (1.2 equiv), TMSOTf (0.1 equiv), 3 Å mol. sieves (4 fold of **10** by wt/wt), CH<sub>2</sub>Cl<sub>2</sub> (100 mM).  
<sup>a</sup>NMR yield, calculated by using dimethyl terephthalate as internal standard. <sup>b</sup>9% of **10** was unreacted.

### Scheme S1. Synthesis of Disaccharide Oxazoline **2b**

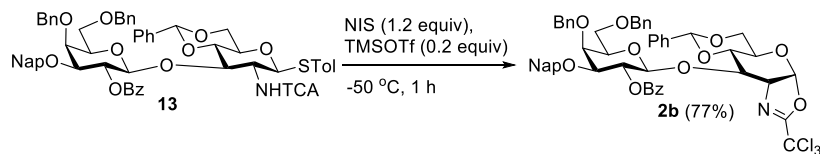

### Scheme S2. Improved Synthesis of Hexasaccharide **15** by Oxazoline Based Approach

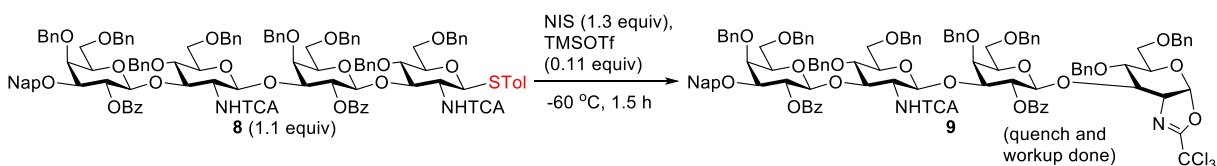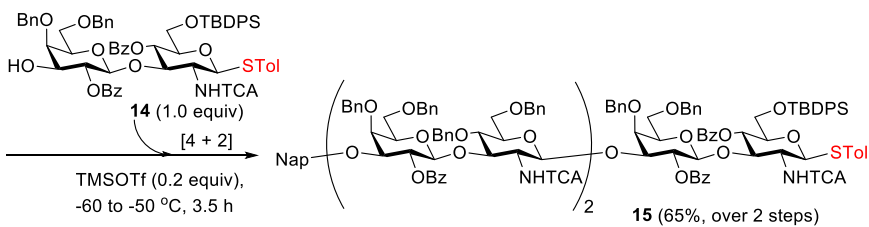

### Scheme S3. Scheme Showing the Calculation of Overall Yield of Octasaccharide **12**

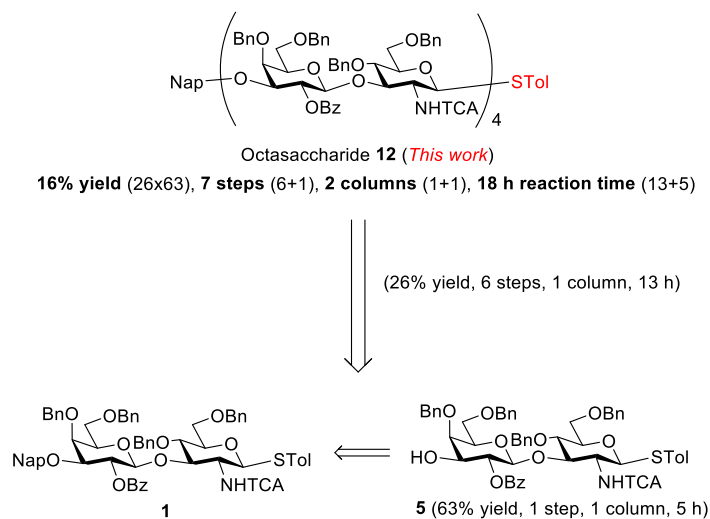

**Figure S1.** Formation of Di-, Tetra-, and Hexasaccharide Oxazolines (**2**, **9**, and **11**) were Confirmed by  $^1\text{H}$  NMR of Crude Reaction Mixtures

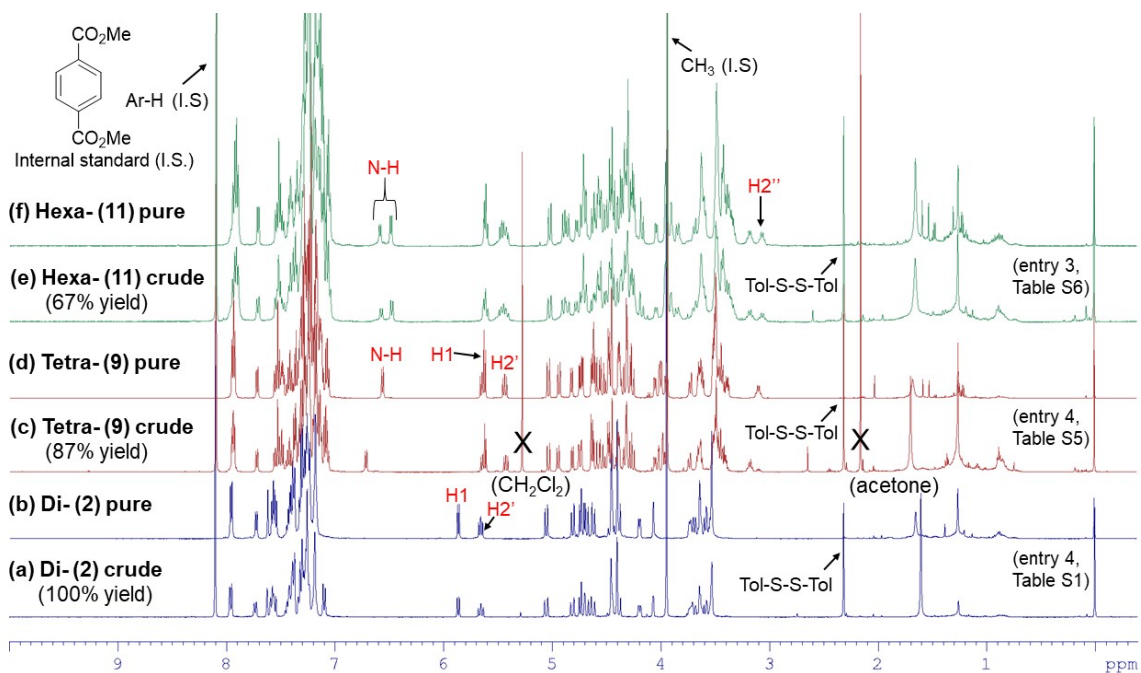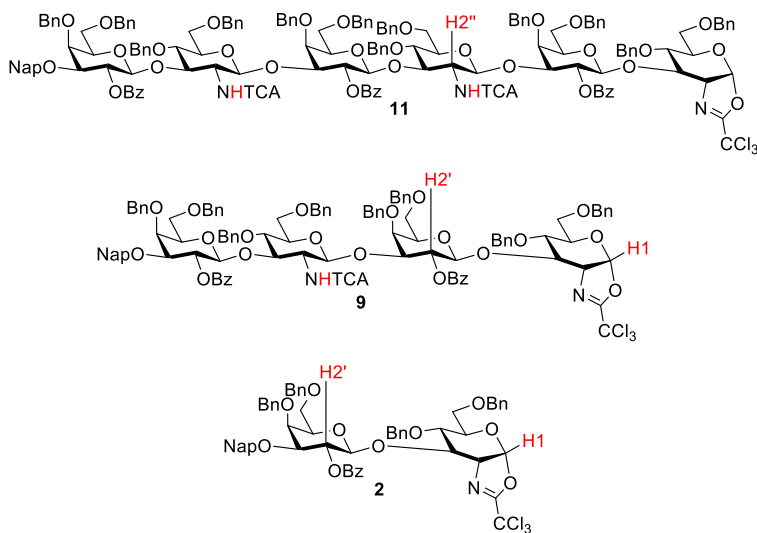

## II. Experimental Procedures

### General experimental procedure.

All reactions were performed in an oven-dried glassware under the nitrogen atmosphere unless otherwise mentioned. The reaction mixtures were purified by using silica gel flash column chromatography. Anhydrous solvents and moisture-sensitive materials were transferred by using an oven-/vacuum-dried syringe or cannula through a rubber septum. Analytical TLC was performed on the precoated glass plates of TLC Silica gel 60 F<sub>254</sub> from Merck and was detected by UV visualization (254 nm) and/or by staining with reagents that contained ceric molybdate (for general use), para-anisaldehyde (for carbohydrates), or ninhydrin (for amino-group-containing samples). Column chromatography was performed on silica gel (Geduran Silicagel 60, 0.040–0.063 mm, from Geduran). <sup>1</sup>H NMR spectra were recorded on Bruker AVII-500 (500 MHz) spectrometer by using tetramethylsilane ( $\delta_{\text{H}} = 0.00$  ppm) and CDCl<sub>3</sub> ( $\delta_{\text{H}} = 7.26$  ppm) as internal standards. <sup>13</sup>C NMR spectra were recorded on Bruker AVII-500 (125 MHz) spectrometer by using CDCl<sub>3</sub> ( $\delta_{\text{C}} = 77.23$  ppm, central line of a triplet) as an internal standard. Structural assignments were made with additional information from 2D-COSY, 2D-HMQC, and 2D-HMBC experiments using gradient pulses for coherence pathway selection, which were acquired on Bruker AVII-500 spectrometer. HRMS was performed on Bruker Bio-TOF III (ESITOF) or Bruker Ultraflex (MALDI-TOF/TOF) spectrometers and is reported as mass/charge (*m/z*) ratios with percentage relative abundance. Optical rotations were measured at the sodium D-line (589 nm) at 25 °C or 20.0 °C on a PerkinElmer model 341 polarimeter. Specific rotations based on the equation  $[\alpha] = (100 \cdot \alpha)/(l \cdot c)$  are reported as unitless numbers, where the *l* is path length (in dm) and *c* is concentration (in g/100 mL). The solvents for extraction and chromatography were of ACS grade. CH<sub>2</sub>Cl<sub>2</sub> and CH<sub>3</sub>CN were predried by using molecular sieves and then percolated through an active Al<sub>2</sub>O<sub>3</sub> column. Anhydrous DMF and MeOH were purchased from Aldrich Chemical Co. and J-T Baker, respectively, in sealed packages. Diphenylsulfoxide (Ph<sub>2</sub>SO) and 2,4,6-tri-*tert*-butylpyrimidine were purchased from Aldrich Chemical Co. All the chemicals were used without further purification unless otherwise specified. Celite 545 and 3 Å molecular sieves (powder < 50 μm) were purchased from Acros Co. and Alfa Aesar Co., respectively.

### General procedure to synthesize di- (2) and tetrasaccharide (9) oxazoline donors by Ph<sub>2</sub>SO/Tf<sub>2</sub>O method (entries 1-3, Table S1; and entry 1, Table S5).

A mixture of thioglycoside donor (1<sup>1</sup> or 8), Ph<sub>2</sub>SO, and TTBP (in entry 3 of Table S1, TTBP was not used) was stirred with 3 Å molecular sieves in anhydrous CH<sub>2</sub>Cl<sub>2</sub> (60 mM w.r.t. thioglycoside donor) at RT for 30 min. After cooling to -60 °C, Tf<sub>2</sub>O was added to reaction mixture, and allowed to stir at -60 °C. After stirring for a period of time (see Tables S1 and S5 for the reaction time), reaction was quenched by dropwise addition of Et<sub>3</sub>N, diluted with CH<sub>2</sub>Cl<sub>2</sub> (5 mL), and filtered. The filtrate was washed with saturated Na<sub>2</sub>S<sub>2</sub>O<sub>3</sub> solution (10 mL), dried over MgSO<sub>4</sub>, filtered, and concentrated by evaporation to yield the pale-yellow residue, which was dried under high vacuum. After that, known amount of dimethyl terephthalate, with distinguishable <sup>1</sup>H NMR peak at 8.1 ppm (s, 4H, Ar-H), was added as internal standard to the crude residue to determine the yield of formed

oxazoline products (**2**<sup>1</sup> & **9**) by <sup>1</sup>H NMR spectrum. <sup>1</sup>H NMR peaks at 5.86 ppm (d, *J* = 7.3 Hz, 1H, H-1) was used to quantify the formation of disaccharide oxazoline **2** by crude <sup>1</sup>H NMR, whereas peaks at 6.56 (d, *J* = 7.6 Hz, 1H, N-H) and 5.44 (dd, *J* = 10.0, 8.0 Hz, 1H, H-2') were used to calculate the yield of tetrasaccharide oxazoline **9**.

**General procedure to synthesize di- (**2**), tetra- (**9**), and hexasaccharide (**11**) oxazoline donors by NIS/TMSOTf method (entry 4, Table S1; entries 2-9, Table S5; and entries 1-3, Table S6).** Thioglycoside donor (**1**, **8**, or **10**) was stirred with 3 Å molecular sieves in CH<sub>2</sub>Cl<sub>2</sub> at RT for 30 min. After cooling the reaction mixture at low temperature (see Tables S1, S5, and S6), NIS was added and followed by the addition of TMSOTf. After stirring for a period of time (see Tables S1, 2, and S4 for the reaction time), reaction was quenched by dropwise addition of Et<sub>3</sub>N, diluted with CH<sub>2</sub>Cl<sub>2</sub> (5 mL), and filtered. The filtrate was washed with saturated Na<sub>2</sub>S<sub>2</sub>O<sub>3</sub> solution (10 mL), dried over MgSO<sub>4</sub>, filtered, and concentrated by evaporation to yield the yellow residue, which was dried under high vacuum. Then, known amount of dimethyl terephthalate was added as internal standard to the crude residue to determine the yield of formed oxazoline products (**2**, **9**, and **11**) by <sup>1</sup>H NMR spectrum. To calculate the yield of hexasaccharide oxazoline (**11**), peak at 3.10-3.02 (m, 1H, H-2'') was integrated in <sup>1</sup>H NMR.

**General procedure for glycosylation of disaccharide oxazoline **2** with cyclohexanol by using different promoters (entries 1-12, Table S2).**

A solution of oxazoline **2**<sup>1</sup> (30 mg, 0.028 mmol) and cyclohexanol (3.50 μL, 0.034 mmol) in anhydrous CH<sub>2</sub>Cl<sub>2</sub> (0.47 mL) was stirred with 3 Å molecular sieves (60 mg) at RT for 30 min under N<sub>2</sub> atmosphere. After cooling to -50 °C, promoter (0.2 equiv, 0.0056 mmol) was added to the reaction mixture. After 1 h, reaction was quenched by dropwise addition of Et<sub>3</sub>N, diluted with CH<sub>2</sub>Cl<sub>2</sub> (5 mL), and filtered. The filtrate was washed with saturated NaHCO<sub>3</sub> solution (10 mL), dried over MgSO<sub>4</sub>, filtered, and concentrated by evaporation to yield the pale-yellow crude. The crude product was mixed with the known amount of internal standard (dimethyl terephthalate) to determine the yield of product (**2a**) by using <sup>1</sup>H NMR. <sup>1</sup>H NMR peaks at 6.8 ppm (d, *J* = 7.2 Hz, 1H, N-H) and 3.18-3.07 (m, 1H, H-2) were used to calculate the yield of product (**2a**) formed. While remaining starting material (**2**) was quantified by integrating peak at 5.86 ppm (d, *J* = 7.3 Hz, 1H, H-1).

**General procedure for glycosylation of disaccharide oxazoline **2b** with cyclohexanol by using different promoters (entries 13-19, Table S2).**

A solution of oxazoline **2b** (30 mg, 0.031 mmol) and cyclohexanol (3.82 μL, 0.037 mmol) in anhydrous CH<sub>2</sub>Cl<sub>2</sub> (0.51 mL) was stirred with 3 Å molecular sieves (60 mg) at RT for 30 min under N<sub>2</sub> atmosphere. After cooling to -50 °C, promoter (0.2 equiv, 0.006 mmol) was added to the reaction mixture. After 2 h, reaction was quenched by dropwise addition of Et<sub>3</sub>N, diluted with CH<sub>2</sub>Cl<sub>2</sub> (5 mL), and filtered. The filtrate was washed with saturated NaHCO<sub>3</sub> solution (10 mL), dried over MgSO<sub>4</sub>, filtered, and concentrated by evaporation to yield the pale-yellow crude. The crude product was mixed with the known amount of internal standard (dimethyl terephthalate) to determine the yield of product (**2c**) by using <sup>1</sup>H NMR. <sup>1</sup>H NMR peaks at 5.18 ppm (d, *J* = 8.1 Hz,

1H, H-1) and 3.19 (td,  $J = 8.0, 7.7$  Hz, 1H, H-2) were used to calculate the yield of product (**2c**) formed. While remaining starting material (**2b**) was quantified by integrating peak at 6.0 ppm (d,  $J = 7.7$  Hz, 1H, H-1).

**General procedure for [2 + 2] glycosylations between disaccharide oxazoline donor **2** and thioglycoside acceptors (**3-5**) (Table S3).**

**Oxazoline **2** + Acceptor **3** (entry 1, Table S3)**

A solution of oxazoline **2** (55.3 mg, 0.052 mmol) and acceptor **3**<sup>1</sup> (40 mg, 0.04 mmol) in anhydrous CH<sub>2</sub>Cl<sub>2</sub> (0.79 mL) was stirred with 3 Å molecular sieves (96 mg) at RT for 30 min under N<sub>2</sub> atmosphere. After cooling to -60 °C, TMSOTf (1.43 μL, 0.008 mmol) was added to the reaction mixture. After 1.5 h, reaction was quenched by dropwise addition of Et<sub>3</sub>N, diluted with CH<sub>2</sub>Cl<sub>2</sub> (5 mL), and filtered. The filtrate was washed with saturated NaHCO<sub>3</sub> solution (10 mL), dried over MgSO<sub>4</sub>, filtered, and concentrated by evaporation to yield the pale-yellow crude that was purified by column chromatography on silica gel with EtOAc/hexanes (1/5, v/v) to yield pure tetrasaccharide **6**<sup>1</sup> (69.1 mg, 84% yield) as white amorphous foam.  $R_f$  0.32 (EtOAc/toluene = 1/8, v/v, run two times). Spectroscopic data were identical to those reported previously.<sup>1</sup>

**Oxazoline **2** + Acceptor **4** (entries 2 & 3, Table S3)**

A solution of oxazoline **2** (55.9 mg, 0.052 mmol) and acceptor **4**<sup>1</sup> (39 mg, 0.04 mmol) in anhydrous CH<sub>2</sub>Cl<sub>2</sub> (0.8 mL) was stirred with 3 Å molecular sieves (95 mg) at RT for 30 min under N<sub>2</sub> atmosphere. After cooling to -60 °C, TMSOTf (1.45 μL, 0.008 mmol) was added to the reaction mixture. After 1.5 h, reaction was quenched by dropwise addition of Et<sub>3</sub>N, diluted with CH<sub>2</sub>Cl<sub>2</sub> (5 mL), and filtered. The filtrate was washed with saturated NaHCO<sub>3</sub> solution (10 mL), dried over MgSO<sub>4</sub>, filtered, and concentrated by evaporation to yield the pale-yellow crude that was purified by column chromatography on silica gel with EtOAc/hexanes (1/5, v/v) to yield pure tetrasaccharide **7**<sup>1</sup> (45 mg, 55% yield) as white amorphous foam.  $R_f$  0.27 (EtOAc/toluene = 1/8, v/v, run two times). Spectroscopic data were identical to those reported previously.<sup>1</sup>

**Oxazoline **2** + Acceptor **5** (entry 6, Table S3)**

A solution of oxazoline **2** (850 mg, 0.79 mmol) and acceptor **5**<sup>1</sup> (758 mg, 0.72 mmol) in anhydrous CH<sub>2</sub>Cl<sub>2</sub> (14.33 mL) was stirred with 3 Å molecular sieves (1.61 g) at RT for 30 min under N<sub>2</sub> atmosphere. After cooling to -60 °C, TMSOTf (26 μL, 0.14 mmol) was added to the reaction mixture. After 2 h, reaction was quenched by dropwise addition of Et<sub>3</sub>N, diluted with CH<sub>2</sub>Cl<sub>2</sub> (25 mL), and filtered. The filtrate was washed with saturated NaHCO<sub>3</sub> solution (25 mL), dried over MgSO<sub>4</sub>, filtered, and concentrated by evaporation to yield the pale-yellow crude that was purified by column chromatography on silica gel with EtOAc/hexanes (1/5, v/v) to yield pure

tetrasaccharide **8**<sup>1</sup> (1.33 g, 87% yield) as white amorphous foam. *R<sub>f</sub>* 0.49 (EtOAc/toluene = 1/8, v/v). Spectroscopic data were identical to those reported previously.<sup>1</sup>

### **Reaction procedures of [2 + 2] glycosylations between disaccharide oxazoline donor 2 and thioglycoside acceptor 5 by quench and workup method (Table S4).**

#### **Ph<sub>2</sub>SO/Tf<sub>2</sub>O method (entry 1, Table S4):**

A mixture of donor **1** (62 mg, 0.052 mmol), Ph<sub>2</sub>SO (6.8 mg, 0.034 mmol), TTBP (14.7 mg, 0.06 mmol) was stirred with 3 Å molecular sieves (125 mg) in anhydrous CH<sub>2</sub>Cl<sub>2</sub> (867 μL) at RT for 30 min. After cooling to -60 °C, Tf<sub>2</sub>O (5.7 μL, 0.034 mmol) was added to reaction mixture, and allowed to stir for 1 h at -60 °C. After 1 h, P(OEt)<sub>3</sub> (5.8 μL, 0.034 mmol) was added to reaction mixture to quench the remaining sulfonium intermediate in the reaction mixture, and stirred for additional 15 min at -60 °C, before quenching with Et<sub>3</sub>N at -60 °C. Reaction mixture was diluted with CH<sub>2</sub>Cl<sub>2</sub> (5 mL), and filtered. The filtrate was washed sequentially with saturated Na<sub>2</sub>S<sub>2</sub>O<sub>3</sub> solution (10 mL) and saturated NaHCO<sub>3</sub> solution (10 mL), dried over MgSO<sub>4</sub>, filtered, and concentrated by evaporation to yield the crude disaccharide oxazoline **2** as pale-yellow foam.

After that, crude oxazoline **2** and acceptor **5** (50 mg, 0.047 mmol) were dried together under high vacuum. Then added 3 Å molecular sieves (112 mg) and anhydrous CH<sub>2</sub>Cl<sub>2</sub> (946 μL), and stirred at RT under N<sub>2</sub> for 30 min. After cooling the reaction mixture to -60 °C, TMSOTf (0.2 equiv, 1.7 μL, 0.0095 mmol) was added to the reaction mixture. However, no reaction happened between oxazoline **2** and acceptor **5**, when checked by TLC. Therefore, after 2 h, 0.2 equiv of TMSOTf was further added, but no improvement occurred, presumably due to presence of TTBP during first step. Thus, more aliquots of TMSOTf were added (0.4 equiv after 3 h and 0.6 equiv after 4 h; in total 1.4 equiv of TMSOTf). After reaction completion, reaction was quenched by dropwise addition of Et<sub>3</sub>N, diluted with CH<sub>2</sub>Cl<sub>2</sub> (5 mL), and filtered. The filtrate was washed with saturated NaHCO<sub>3</sub> solution (10 mL), dried over MgSO<sub>4</sub>, filtered, and concentrated by evaporation to yield the pale-yellow residue that was purified by column chromatography on silica gel with EtOAc/hexanes (1/4, v/v) to yield pure tetrasaccharide **8** (58.2 mg, 58% yield) as white amorphous foam.

#### **NIS/TMSOTf method (entries 2 & 3, Table S4):**

Donor **1** was stirred with 3 Å molecular sieves (2xwt of **1**) in anhydrous CH<sub>2</sub>Cl<sub>2</sub> (60 mM w.r.t. **1**) at RT for 30 min. After cooling the reaction mixture to -50 °C, NIS was added, and followed by the addition of TMSOTf (see Table S1 for the NIS and TMSOTf equiv). After 30 min, reaction was quenched by dropwise addition of Et<sub>3</sub>N, diluted with CH<sub>2</sub>Cl<sub>2</sub> (5 mL), and filtered. The filtrate was washed sequentially with saturated Na<sub>2</sub>S<sub>2</sub>O<sub>3</sub> solution (10 mL) and saturated NaHCO<sub>3</sub> solution (10 mL), dried over MgSO<sub>4</sub>, filtered, and concentrated by evaporation to yield the crude disaccharide oxazoline **2** as yellow foam.

Crude oxazoline **2** and acceptor **5** (1.0 equiv) were dried together under high vacuum. Added 3 Å molecular sieves (Donor+Acceptor, wt./wt.) and CH<sub>2</sub>Cl<sub>2</sub> (50 mM w.r.t. **5**), and stirred

at RT under N<sub>2</sub> for 30 min. After cooling the reaction mixture to -60 °C, TMSOTf (0.2 equiv) was added. After stirring for 2 h, reaction was quenched by dropwise addition of Et<sub>3</sub>N, diluted with CH<sub>2</sub>Cl<sub>2</sub> (5 mL), and filtered. The filtrate was washed with saturated NaHCO<sub>3</sub> solution (10 mL), dried over MgSO<sub>4</sub>, filtered, and concentrated by evaporation to yield the pale-yellow residue that was purified by column chromatography on silica gel with EtOAc/hexanes (1/4, v/v) to yield pure tetrasaccharide **8** as white amorphous foam.

**General quench and workup procedure used in Scheme 3 during the [2 + 2 + 2] and [2 + 2 + 2 + 2] iterative synthesis of hexa- (10) and octasaccharides (12).**

After the reaction was quenched by dropwise addition of Et<sub>3</sub>N (2xvolume of TMSOTf added in reaction), diluted with CH<sub>2</sub>Cl<sub>2</sub>, and filtered. The filtrate was washed sequentially with saturated Na<sub>2</sub>S<sub>2</sub>O<sub>3</sub> solution and saturated NaHCO<sub>3</sub> solution, dried over MgSO<sub>4</sub>, and filtered. Then silica (230-400 mesh size, 4xwt of glycosides) was added to the crude in CH<sub>2</sub>Cl<sub>2</sub>, and dried by evaporation under rota vapor. The crude silica residue was washed sequentially with hexanes (to remove Tol-S-S-Tol impurity) and EtOAc (to elute the crude product) using filter paper. EtOAc fraction was collected and concentrated by evaporation to yield the pale yellow crude di- (**2**), tetra- (**9**), or hexasaccharide oxazolines (**11**).

**Cyclohexanyl (2-*O*-benzoyl-4,6-di-*O*-benzyl-3-*O*-(naphthalen-2-ylmethyl)- $\beta$ -D-galactopyranosyl)-(1 $\rightarrow$ 3)-4,6-di-*O*-benzyl-2-deoxy-2-trichloroacetamido- $\beta$ -D-glucopyranoside (**2a**).**

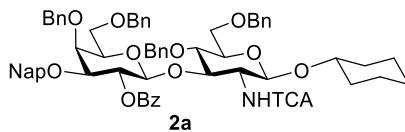

The crude reaction mixture (from Table S2) was subjected to column chromatography on silica gel with EtOAc/hexanes (1/5, v/v) to yield the pure **2a** as white amorphous foam.  $R_f$  0.5 (EtOAc/toluene = 1/8, v/v);  $[\alpha]_D^{20}$  -7.22 ( $c$  0.83, CHCl<sub>3</sub>); <sup>1</sup>H NMR (500 MHz, CDCl<sub>3</sub>):  $\delta$  7.94 (d,  $J$  = 7.65 Hz, 2H, Ar-H), 7.75 (d,  $J$  = 7.75 Hz, 1H, Ar-H), 7.63-7.51 (m, 4H, Ar-H), 7.49-7.40 (m, 2H, Ar-H), 7.39-7.34 (m, 4H, Ar-H), 7.33-7.22 (m, 14H, Ar-H), 7.21-7.14 (m, 3H, Ar-H), 7.12-7.06 (m, 2H, Ar-H), 6.8 (d,  $J$  = 7.2 Hz, 1H, N-H), 5.7 (dd,  $J$  = 9.8, 7.0 Hz, 1H, H-2'), 5.06 (d,  $J$  = 11.4 Hz, 1H, CH<sub>2</sub>Ph), 4.98 (d,  $J$  = 10.2 Hz, 1H, CH<sub>2</sub>Ph), 4.84 (d,  $J$  = 7.7 Hz, 1H, H-1), 4.79 (d,  $J$  = 12.4 Hz, 1H, CH<sub>2</sub> group of Nap), 4.66-4.50 (m, 6H, H-1', H-3, CH<sub>2</sub> group of Nap, 3xCH<sub>2</sub>Ph), 4.44-4.36 (m, 2H, 2xCH<sub>2</sub>Ph), 4.30 (d,  $J$  = 11.8 Hz, 1H, CH<sub>2</sub>Ph), 4.06 (s, 1H, H-4'), 3.72 (d,  $J$  = 9.5 Hz, 1H, H-6a), 3.66 (dd,  $J$  = 10.6, 4.5 Hz, 1H, H-6b), 3.62-3.43 (m, 7H, H-3', H-4, H-5, H-5', H-6a', H-6b', cyclohexanyl), 3.18-3.07 (m, 1H, H-2), 1.84-1.77 (m, 1H, cyclohexanyl), 1.76-1.65 (m, 2H, cyclohexanyl), 1.64-1.54 (m, 2H, cyclohexanyl), 1.47-1.39 (m, 1H, cyclohexanyl), 1.24-1.06 (m, 4H, cyclohexanyl); <sup>13</sup>C NMR (125 MHz, CDCl<sub>3</sub>):  $\delta$  165.47 (C), 161.50 (C), 138.85 (C), 138.41 (C), 138.38 (C), 138.05 (C), 135.02 (C), 133.24 (CH), 133.14 (C), 130.12 (C), 130.03 (CH),



128.71 (CH), 128.62 (CH), 128.58 (CH), 128.48 (CH), 128.42 (CH), 128.18 (CH), 128.15 (CH), 128.06 (CH), 127.97 (CH), 127.91 (CH), 127.80 (CH), 127.69 (CH), 127.56 (CH), 126.98 (CH), 126.29 (CH), 126.16 (CH), 126.08 (CH), 100.73 (CH), 96.62 (CH), 92.65 (C), 79.51 (CH), 77.47 (CH), 76.58 (CH), 76.45 (CH), 74.97 (CH<sub>2</sub>), 74.71 (CH), 73.82 (CH), 73.74 (CH<sub>2</sub>), 73.51 (CH<sub>2</sub>), 73.04 (CH), 72.20 (CH), 71.88 (CH<sub>2</sub>), 69.34 (CH<sub>2</sub>), 68.19 (CH<sub>2</sub>), 59.55 (CH), 33.49 (CH<sub>2</sub>), 31.82 (CH<sub>2</sub>), 25.61 (CH<sub>2</sub>), 24.13 (CH<sub>2</sub>), 23.98 (CH<sub>2</sub>); HRMS (ESI-TOF): *m/z* calcd for C<sub>66</sub>H<sub>68</sub>Cl<sub>3</sub>NO<sub>12</sub>Na [M + Na]<sup>+</sup>, 1196.3692; found, 1196.3696.

**2-Trichloromethyl-3-O-(2-O-benzoyl-4,6-di-O-benzyl-3-O-(naphthalen-2-ylmethyl)-β-D-galactopyranosyl)-4,6-O-benzylidene-1,2-dideoxy-α-D-glucopyrano-[2,1-d]-2-oxazoline (2b):**

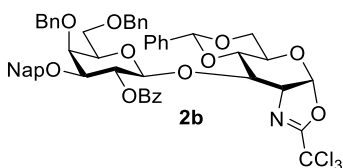

A solution of **13**<sup>1</sup> (200 mg, 0.18 mmol) in anhydrous CH<sub>2</sub>Cl<sub>2</sub> (3.61 mL) was stirred with 3 Å molecular sieves (400 mg) at RT for 30 min under N<sub>2</sub> atmosphere. After cooling to -50 °C, NIS (49 mg, 0.22 mmol) was added to the reaction mixture, followed by the addition of TMSOTf (6.6 μL, 0.036 mmol). After 1 h, reaction was quenched by dropwise addition of Et<sub>3</sub>N, diluted with CH<sub>2</sub>Cl<sub>2</sub> (5 mL), and filtered. The filtrate was washed with saturated Na<sub>2</sub>S<sub>2</sub>O<sub>3</sub> solution (10 mL), dried over MgSO<sub>4</sub>, filtered, and concentrated by evaporation to yield the yellow residue that was purified by column chromatography on silica gel with EtOAc/hexanes (1/5, v/v) to yield pure oxazoline **2b** (137 mg, 77% yield) as white amorphous foam. *R<sub>f</sub>* 0.42 (EtOAc/hexanes = 1/3, v/v); [α]<sub>D</sub><sup>25</sup> 12.7 (*c* 1.1, CHCl<sub>3</sub>); <sup>1</sup>H NMR (500 MHz, CDCl<sub>3</sub>): δ 8.04-7.97 (m, 2H, Ar-H), 7.72 (d, *J* = 7.6 Hz, 1H, Ar-H), 7.61-7.50 (m, 4H, Ar-H), 7.45-7.35 (m, 7H, Ar-H), 7.34-7.19 (m, 13H, Ar-H), 6.00 (d, *J* = 7.7 Hz, 1H, H-1), 5.69 (dd, *J* = 10.0, 8.1 Hz, 1H, H-1'), 5.50 (s, 1H, CHPh), 5.00 (d, *J* = 11.65 Hz, 1H, Nap-CH<sub>2</sub>), 4.80-4.73 (m, 2H, H-1', CH<sub>2</sub>Ph), 4.68 (d, *J* = 11.7 Hz, 1H, CH<sub>2</sub>Ph), 4.59 (d, *J* = 12.4 Hz, 1H, Nap-CH<sub>2</sub>), 4.34-4.29 (m, 3H, H-6a, CH<sub>2</sub>Ph), 4.20 (dd, *J* = 7.6, 3.0 Hz, 1H, H-2), 4.10 (dd, *J* = 7.1, 3.0 Hz, 1H, H-3), 4.03 (d, *J* = 2.4 Hz, 1H, H-4'), 3.89 (dd, *J* = 9.9, 7.1 Hz, 1H, H-4), 3.70-3.63 (m, 2H, H-3', H-5'), 3.62-3.56 (m, 2H, H-6b, H-6a'), 3.53-3.44 (m, 2H, H-5, H-6b); <sup>13</sup>C NMR (125 MHz, CDCl<sub>3</sub>): δ 165.7 (C), 162.3 (C), 138.5 (C), 137.9 (C), 137.2 (C), 135.1 (C), 133.2 (CH), 133.2 (C), 133.1 (C), 130.2 (C), 130.1 (CH), 129.2 (CH), 128.7 (CH), 128.6 (CH), 128.5 (CH), 128.4 (CH), 128.3 (CH), 128.2 (CH), 128.1 (CH), 128.0 (CH), 127.9 (CH), 127.8 (CH), 126.7 (CH), 126.3 (CH), 126.1 (CH), 125.9 (CH), 105.1 (CH), 102.0 (CH), 101.4 (CH), 86.4 (C), 80.4 (CH), 79.9 (CH), 78.8 (CH), 74.8 (CH<sub>2</sub>), 73.9 (CH), 73.8 (CH<sub>2</sub>), 72.2 (CH), 71.9 (CH<sub>2</sub>), 69.1 (CH), 68.66 (CH<sub>2</sub>), 68.62 (CH<sub>2</sub>), 63.4 (CH); HRMS (ESI-TOF): *m/z* calcd for C<sub>53</sub>H<sub>48</sub>Cl<sub>3</sub>NO<sub>11</sub>H [M+H]<sup>+</sup>, 980.2366; found, 980.2376.

**Cyclohexanyl (2-O-benzoyl-4,6-di-O-benzyl-3-O-(naphthalen-2-ylmethyl)-β-D-galactopyranosyl)-(1→3)-4,6-O-benzylidene-2-deoxy-2-trichloroacetamido-β-D-glucopyranoside (2c).**

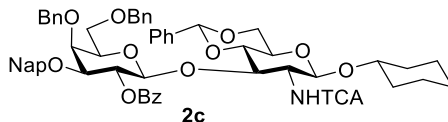

The crude reaction mixture (from Table S2) was subjected to column chromatography on silica gel with EtOAc/hexanes (1/5, v/v) to yield the pure **2c** as white amorphous foam.  $R_f$  0.31 (EtOAc/toluene = 1/8, v/v);  $[\alpha]^{20}_D +5.607$  ( $c$  1.07,  $\text{CHCl}_3$ );  $^1\text{H NMR}$  (500 MHz,  $\text{CDCl}_3$ ):  $\delta$  7.9 (d,  $J = 7.65$  Hz, 2H, Ar-H), 7.71 (d,  $J = 7.7$  Hz, 1H, Ar-H), 7.55-7.46 (m, 4H, Ar-H), 7.45-7.36 (m, 4H, Ar-H), 7.36-7.26 (m, 10H, Ar-H), 7.24-7.21 (m, 4H, Ar-H), 7.16 (d,  $J = 8.35$  Hz, 1H, Ar-H), 6.98 (d,  $J = 6.35$  Hz, 1H, N-H), 5.62 (t,  $J = 8.9$  Hz, 1H, H-2'), 5.45 (s, 1H, PhCH), 5.18 (d,  $J = 8.1$  Hz, 1H, H-1), 4.98 (d,  $J = 11.7$  Hz, 1H,  $\text{CH}_2\text{Ph}$ ), 4.78-4.67 (m, 2H, H-1',  $\text{CH}_2$  group of Nap), 4.65-4.57 (m, 2H, H-3,  $\text{CH}_2\text{Ph}$ ), 4.51 (d,  $J = 12.3$  Hz, 1H,  $\text{CH}_2$  group of Nap), 4.36 (d,  $J = 11.6$  Hz, 1H,  $\text{CH}_2\text{Ph}$ ), 4.32-4.22 (m, 2H, H-6a,  $\text{CH}_2\text{Ph}$ ), 3.97 (s, 1H, H-4'), 3.75-3.67 (m, 2H, H-4, H-6a'), 3.63 (t,  $J = 8.0$  Hz, 1H, H-6b'), 3.58-3.4 (m, 5H, H-5, H-3', H-5', H-6b, cyclohexanyl), 3.19 (td,  $J = 8.0, 7.7$  Hz, 1H, H-2), 1.87-1.79 (m, 1H, cyclohexanyl), 1.77-1.57 (m, 4H, cyclohexanyl), 1.52-1.42 (m, 1H, cyclohexanyl), 1.34-1.27 (m, 1H, cyclohexanyl), 1.23-1.11 (m, 4H, cyclohexanyl);  $^{13}\text{C NMR}$  (125 MHz,  $\text{CDCl}_3$ ):  $\delta$  165.43 (C), 161.92 (C), 138.68 (C), 137.92 (C), 137.57 (C), 135.06 (C), 133.19 (C), 133.15 (CH), 133.08 (C), 130.12 (CH), 128.97 (CH), 128.64 (CH), 128.48 (CH), 128.40 (CH), 128.31 (CH), 128.23 (CH), 128.06 (CH), 128.01 (CH), 127.78 (CH), 127.70 (CH), 126.73 (CH), 126.32 (CH), 126.21 (CH), 126.08 (CH), 125.92 (CH), 101.11 (CH), 100.14 (CH), 97.14 (CH), 92.25 (C), 80.12 (CH), 79.89 (CH), 78.14 (CH), 75.25 (CH), 74.64 ( $\text{CH}_2$ ), 73.78 ( $\text{CH}_2$ ), 73.45 (CH), 72.56 (CH), 72.20 (CH), 71.93 ( $\text{CH}_2$ ), 68.86 ( $\text{CH}_2$ ), 68.69 ( $\text{CH}_2$ ), 66.29 (CH), 60.10 (CH), 33.6 ( $\text{CH}_2$ ), 31.99 ( $\text{CH}_2$ ), 25.58 ( $\text{CH}_2$ ), 24.18 ( $\text{CH}_2$ ), 24.04 ( $\text{CH}_2$ ); HRMS (ESI-TOF):  $m/z$  calcd for  $\text{C}_{59}\text{H}_{60}\text{Cl}_3\text{NO}_{12}\text{Na}$  [ $\text{M} + \text{Na}$ ] $^+$ , 1104.3048; found, 1104.3031.

**4-Methylphenyl (2-*O*-benzoyl-4,6-di-*O*-benzyl- $\beta$ -D-galactopyranosyl)-(1 $\rightarrow$ 3)-(4,6-di-*O*-benzyl-2-deoxy-2-trichloroacetamido- $\beta$ -D-glucopyranosyl)-(1 $\rightarrow$ 3)-(2-*O*-benzoyl-4,6-di-*O*-benzyl- $\beta$ -D-galactopyranosyl)-(1 $\rightarrow$ 3)-4,6-di-*O*-benzyl-2-deoxy-2-trichloroacetamido-1-thio- $\beta$ -D-glucopyranoside (**8a**).**

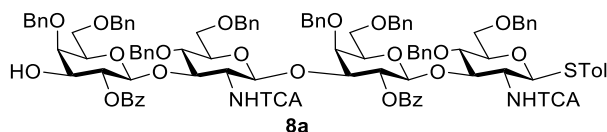

To a solution of compound **8** (250 mg, 0.12 mmol) in a 2.4:1 (v/v) mixture of  $\text{CH}_2\text{Cl}_2$  (2.07 mL) and dd.  $\text{H}_2\text{O}$  (0.86 mL), DDQ (40 mg, 0.18 mmol) was added at RT. After 1 h 15 min, additional 20 mg (0.09 mmol) of DDQ was added, and let the reaction stirred for another 1 h. Saturated  $\text{NaHCO}_3$  solution (1 mL) was then slowly added to the reaction mixture under the ice bath to quench the reaction. Solvent extraction was done to wash the  $\text{CH}_2\text{Cl}_2$  layer with saturated  $\text{NaHCO}_3$  solution (10 mL, 2 times).  $\text{CH}_2\text{Cl}_2$  layer was collected, dried over  $\text{MgSO}_4$ , filtered, and concentrated by evaporation to yield the yellow viscous crude that was purified by column chromatography on silica gel with EtOAc/hexanes (1/5 to 1/4, v/v) to yield the desired pure product

**8a** (88.2 mg, 38%) as white amorphous foam.  $R_f$  0.24 (EtOAc/hexanes = 1/3, v/v, run two times);  $[\alpha]_D^{20}$  -21.82 ( $c$  2.2,  $\text{CHCl}_3$ );  $^1\text{H NMR}$  (500 MHz,  $\text{CDCl}_3$ ):  $\delta$  8.06-8.02 (m, 2H, Ar-H), 8.00-7.96 (m, 2H, Ar-H), 7.51 (t,  $J$  = 7.3 Hz, 1H, Ar-H), 7.44 (t,  $J$  = 7.4 Hz, 1H, Ar-H), 7.41-7.38 (m, 2H, Ar-H), 7.38-7.32 (m, 3H, Ar-H), 7.32-7.06 (m, 41H, Ar-H), 6.90 (d,  $J$  = 7.9 Hz, 2H, Ar-H), 6.82 (d,  $J$  = 7.8 Hz, 1H, N-H), 6.77 (d,  $J$  = 8.0 Hz, 1H, N-H), 5.55 (dd,  $J$  = 9.9, 8.0 Hz, 1H, H-2'), 5.22 (dd,  $J$  = 9.9, 8.1 Hz, 1H, H-2'''), 4.94-4.86 (m, 2H, 2x $\text{CH}_2\text{Ph}$ ), 4.85-4.78 (m, 3H, H-1, H-1'',  $\text{CH}_2\text{Ph}$ ), 4.76-4.70 (m, 2H, H-1''',  $\text{CH}_2\text{Ph}$ ), 4.67-4.60 (m, 2H, H-1',  $\text{CH}_2\text{Ph}$ ), 4.55-4.28 (m, 12H, H-3, H-3'', 10x $\text{CH}_2\text{Ph}$ ), 4.24 (d,  $J$  = 11.8 Hz, 1H,  $\text{CH}_2\text{Ph}$ ), 4.00-3.95 (m, 2H, H-3', H-4'), 3.83 (d,  $J$  = 3.0 Hz, 1H, H-4'''), 3.74-3.35 (m, 16H, H-2'', H-3', H-4, H-4'', H-5, H-5', H-5'', H-5''', H-6a, H-6b, H-6a', H-6b', H-6a'', H-6b'', H-6a''', H-6b'''), 3.31-3.22 (m, 1H, H-2), 2.51 (d,  $J$  = 8.6 Hz, 1H, O-H), 2.25 (s, 3H,  $\text{PhCH}_3$ );  $^{13}\text{C NMR}$  (125 MHz,  $\text{CDCl}_3$ ):  $\delta$  167.24 (C), 165.16 (C), 161.38 (C), 161.14 (C), 139.12 (C), 138.43 (C), 138.24 (C), 138.19 (C), 138.13 (C), 138.09 (C), 137.70 (C), 133.53 (CH), 133.46 (CH), 132.97 (CH), 130.11 (CH), 129.98 (C), 129.78 (CH), 129.63 (C), 129.0 (C), 128.77 (CH), 128.67 (CH), 128.63 (CH), 128.59 (CH), 128.56 (CH), 128.54 (CH), 128.46 (CH), 128.32 (CH), 128.28 (CH), 128.20 (CH), 128.16 (CH), 128.05 (CH), 128.03 (CH), 127.93 (CH), 127.87 (CH), 127.72 (CH), 127.67 (CH), 127.63 (CH), 127.45 (CH), 100.49 (CH), 99.68 (CH), 99.51 (CH), 92.80 (C), 92.51 (C), 84.81 (CH), 78.86 (CH), 77.63 (CH), 77.31 (CH), 76.84 (CH), 76.78 (CH), 76.54 (CH), 76.28 (CH), 75.97 (CH), 75.69 (CH<sub>2</sub>), 75.20 (CH), 75.11 (CH<sub>2</sub>), 74.89 (CH<sub>2</sub>), 74.83 (CH<sub>2</sub>), 74.56 (CH), 74.23 (CH), 73.62 (CH<sub>2</sub>), 73.50 (CH<sub>2</sub>), 73.44 (CH), 72.81 (CH), 69.37 (CH<sub>2</sub>), 69.08 (CH<sub>2</sub>), 68.62 (CH<sub>2</sub>), 68.25 (CH<sub>2</sub>), 59.07 (CH), 57.13 (CH), 21.27 (CH<sub>3</sub>); HRMS (ESI-TOF):  $m/z$  calcd for  $\text{C}_{105}\text{H}_{105}\text{Cl}_6\text{N}_2\text{O}_{22}\text{S}$   $[\text{M} + \text{H}]^+$ , 1991.4995; found, 1991.4990.

**2-Trichloromethyl-3-O-(2-O-benzoyl-4,6-di-O-benzyl-3-O-(naphthalen-2-ylmethyl)- $\beta$ -D-galactopyranosyl)-(1 $\rightarrow$ 3)-(4,6-di-O-benzyl-2-deoxy-2-trichloroacetamido- $\beta$ -D-glucopyranosyl)-(1 $\rightarrow$ 3)-(2-O-benzoyl-4,6-di-O-benzyl- $\beta$ -D-galactopyranosyl)-4,6-di-O-benzyl-1,2-dideoxy- $\alpha$ -D-glucopyrano-[2,1-d]-2-oxazoline (9).**

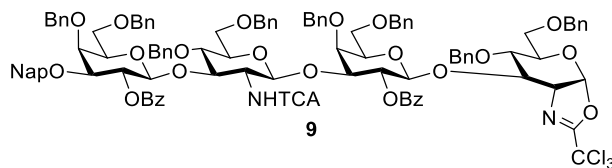

The crude reaction mixture (from Table S5) was subjected to column chromatography on silica gel with EtOAc/toluene (1/13 to 1/8, v/v) to yield the pure **9** as white amorphous foam.  $R_f$  0.38 (EtOAc/toluene = 1/8, v/v, run two times);  $[\alpha]_D^{20}$  -6.35 ( $c$  2.05,  $\text{CHCl}_3$ );  $^1\text{H NMR}$  (500 MHz,  $\text{CDCl}_3$ ):  $\delta$  7.99-7.90 (m, 4H, Ar-H), 7.72 (d,  $J$  = 7.7 Hz, 1H, Ar-H), 7.58-7.46 (m, 5H, Ar-H), 7.46-7.35 (m, 4H, Ar-H), 7.35-7.31 (m, 5H, Ar-H), 7.31-7.27 (m, 9H, Ar-H), 7.27-7.25 (m, 3H, Ar-H), 7.25-7.24 (m, 3H, Ar-H), 7.24-7.23 (m, 4H, Ar-H), 7.21-7.16 (m, 12H, Ar-H), 7.15-7.11 (m, 5H, Ar-H), 7.10-7.05 (m, 2H, Ar-H), 6.56 (d,  $J$  = 7.6 Hz, 1H, N-H), 5.68-5.60 (m, 2H, H-1, H-2'''), 5.44 (dd,  $J$  = 10.0, 8.0 Hz, 1H, H-2'), 5.03 (d,  $J$  = 11.5 Hz, 1H,  $\text{CH}_2\text{Ph}$ ), 4.94 (d,  $J$  = 10.3 Hz, 1H,

CH<sub>2</sub>Ph), 4.82 (d, *J* = 8.1 Hz, 1H, H-1''), 4.77-4.71 (m, 2H, CH<sub>2</sub>Ph, CH<sub>2</sub> group of Nap), 4.65-4.24 (m, 18H, H-1', H-1''', H-3, H-3'', CH<sub>2</sub> group of Nap, 13xCH<sub>2</sub>Ph), 4.05 (dd, *J* = 7.3, 1.7 Hz, 1H, H-2), 4.01 (d, *J* = 2.5 Hz, 1H, H-4'), 3.99 (d, *J* = 2.1 Hz, 1H, H-4'''), 3.94 (dd, *J* = 10.2, 2.8 Hz, 1H, H-3'), 3.73 (d, *J* = 10.3, 1.9 Hz, 1H, H-6a''), 3.68-3.59 (m, 3H, H-4, H-5', H-6b''), 3.54-3.36 (m, 11H, H-3''', H-4'', H-5, H-5'', H-5''', H-6a, H-6b, H-6a', H-6b', H-6a''', H-6b'''), 3.10 (dd, *J* = 16.4, 8.2 Hz, 1H, H-2''); <sup>13</sup>C NMR (125 MHz, CDCl<sub>3</sub>): δ 165.69 (C), 164.94 (C), 162.85 (C), 161.22 (C), 138.97 (C), 138.79 (C), 138.19 (C), 138.15 (C), 137.95 (C), 137.91 (C), 137.82 (C), 134.92 (C), 133.60 (CH), 133.32 (CH), 133.17 (C), 133.11 (C), 130.02 (CH), 129.91 (CH), 128.78 (CH), 128.70 (CH), 128.61 (CH), 128.57 (CH), 128.48 (CH), 128.41 (CH), 128.32 (CH), 128.24 (CH), 128.16 (CH), 128.08 (CH), 127.98 (CH), 127.94 (CH), 127.91 (CH), 127.88 (CH), 127.86 (CH), 127.77 (CH), 127.74 (CH), 127.68 (CH), 127.56 (CH), 126.91 (CH), 126.26 (CH), 126.14 (CH), 125.97 (CH), 104.16 (CH), 100.97 (CH), 100.38 (CH), 99.28 (CH), 92.34 (C), 86.47 (C), 79.48 (CH), 78.25 (CH), 76.74 (CH), 76.40 (CH), 76.22 (CH), 75.45 (CH), 75.07 (CH<sub>2</sub>), 75.02 (CH<sub>2</sub>), 74.97 (CH<sub>2</sub>), 74.68 (CH), 74.15 (CH), 73.75 (CH), 73.67 (CH<sub>2</sub>), 73.62 (CH<sub>2</sub>), 73.33 (CH<sub>2</sub>), 73.07 (CH), 72.36 (CH), 72.15 (CH), 71.95 (CH<sub>2</sub>), 71.62 (CH<sub>2</sub>), 71.23 (CH), 69.74 (CH<sub>2</sub>), 69.44 (CH<sub>2</sub>), 68.90 (CH<sub>2</sub>), 68.23 (CH<sub>2</sub>), 66.28 (CH), 59.45 (CH); HRMS (ESI-TOF): *m/z* calcd for C<sub>109</sub>H<sub>105</sub>Cl<sub>6</sub>N<sub>2</sub>O<sub>22</sub> [M + H]<sup>+</sup>, 2007.5277; found, 2007.5284.

**4-Methylphenyl (2-*O*-benzoyl-4,6-di-*O*-benzyl-3-*O*-(naphthalen-2-ylmethyl)-β-D-galactopyranosyl)-(1→3)-(4,6-di-*O*-benzyl-2-deoxy-2-trichloroacetamido-β-D-glucopyranosyl)-(1→3)-(2-*O*-benzoyl-4,6-di-*O*-benzyl-β-D-galactopyranosyl)-(1→3)-(4,6-di-*O*-benzyl-2-deoxy-2-trichloroacetamido-β-D-glucopyranosyl)-(1→3)-(2-*O*-benzoyl-4,6-di-*O*-benzyl-β-D-galactopyranosyl)-(1→3)-4,6-di-*O*-benzyl-2-deoxy-2-trichloroacetamido-1-thio-β-D-glucopyranoside (10).**

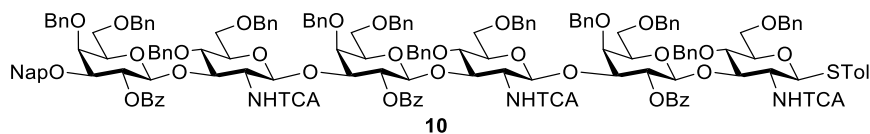

**Synthesis of hexasaccharide 10 by [4 + 2] glycosylation between tetrasaccharide oxazoline 9 and thioglycoside disaccharide acceptor 5 (Scheme 2)**

A mixture of tetrasaccharide oxazoline donor **9** (59.8 mg, 0.03 mmol) and disaccharide acceptor **5** (29 mg, 0.027 mmol) was stirred with 3 Å molecular sieves (90 mg) in anhydrous CH<sub>2</sub>Cl<sub>2</sub> (550 μL) for 30 min at RT under N<sub>2</sub> atmosphere. After cooling the reaction mixture to -60 °C for about 25 min, 10 μL of diluted TMSOTf (0.0054 mmol) solution in CH<sub>2</sub>Cl<sub>2</sub> was then added, and reaction mixture was allowed to continuously stir at -60 °C for 2.5 h. Reaction was quenched by dropwise addition of Et<sub>3</sub>N, diluted with CH<sub>2</sub>Cl<sub>2</sub> (5 mL), filtered, and washed with saturated NaHCO<sub>3</sub> solution (10 mL). CH<sub>2</sub>Cl<sub>2</sub> layer was collected, dried over MgSO<sub>4</sub>, filtered, and concentrated by evaporation to yield pale yellow crude that was subjected to column chromatography on silica gel with EtOAc/hexanes (1/4, v/v) to yield the pure hexasaccharide **10** (63.6 mg, 77%) as white amorphous foam.

### Synthesis of hexasaccharide **10** by [2 + 4] glycosylation between disaccharide oxazoline **2** and thioglycoside tetrasaccharide acceptor **8a** (Scheme 2)

A mixture of disaccharide oxazoline donor **2** (24 mg, 0.022 mmol) and tetrasaccharide acceptor **8a** (40 mg, 0.020 mmol) was stirred with 3 Å molecular sieves (64 mg) in anhydrous CH<sub>2</sub>Cl<sub>2</sub> (402 µL) for 30 min at RT under N<sub>2</sub> atmosphere. After cooling the reaction mixture to -60 °C for about 25 min, 10 µL of diluted TMSOTf (0.004 mmol) solution in CH<sub>2</sub>Cl<sub>2</sub> was then added, and reaction mixture was allowed to continuously stir at -60 °C for 2.5 h. Reaction was quenched by dropwise addition of Et<sub>3</sub>N, diluted with CH<sub>2</sub>Cl<sub>2</sub> (5 mL), filtered, and washed with saturated NaHCO<sub>3</sub> solution (10 mL). CH<sub>2</sub>Cl<sub>2</sub> layer was collected, dried over MgSO<sub>4</sub>, filtered, and concentrated by evaporation to yield pale yellow crude that was subjected to column chromatography on silica gel with EtOAc/hexanes (1/4, v/v) to yield the pure hexasaccharide **10** (46.6 mg, 76%) as white amorphous foam.

### Synthesis of hexasaccharide **10** by [2 + 2 + 2] iterative glycosylation (Scheme 3)

#### *Synthesis of disaccharide oxazoline **2** (Step I)*

A solution of disaccharide **1** (80 mg, 0.067 mmol) in dry CH<sub>2</sub>Cl<sub>2</sub> (1.11 mL) was stirred with 3 Å powdered molecular sieves (160 mg) at RT under N<sub>2</sub> for 30 min. NIS (18.03 mg, 0.08 mmol) and TMSOTf (2.42 µL, 0.013 mmol) were sequentially added to the reaction mixture after cooling to -50 °C. The reaction was quenched after 15 min by dropwise addition of Et<sub>3</sub>N (4.84 µL) at -50 °C, diluted with CH<sub>2</sub>Cl<sub>2</sub> (5 mL), and filtered. The filtrate was washed sequentially with saturated Na<sub>2</sub>S<sub>2</sub>O<sub>3</sub> solution (10 mL) and saturated NaHCO<sub>3</sub> solution (10 mL), dried over MgSO<sub>4</sub>, and filtered. Then silica (230-400 mesh size, 320 mg) was added to the crude in CH<sub>2</sub>Cl<sub>2</sub>, and dried by evaporation under rota vapor. The crude silica residue was washed sequentially with hexanes (30 mL, to remove Tol-S-S-Tol impurity) and EtOAc (40 mL, to elute the crude product) using filter paper. EtOAc fraction was collected and concentrated by evaporation to yield the pale yellow crude disaccharide oxazoline **2**.

#### *[2 + 2] glycosylation and synthesis of tetrasaccharide oxazoline **9** (Steps II & III)*

A mixture of crude oxazoline **2** and acceptor **5** (59 mg, 0.056 mmol) was stirred with 3 Å molecular sieves (139 mg) in anhydrous CH<sub>2</sub>Cl<sub>2</sub> (1.11 mL) for 30 min at RT under N<sub>2</sub> atmosphere. After cooling the reaction mixture to -50 °C, TMSOTf (1 µL, 0.0056 mmol) was added. After stirring for 2 h 10 min, temperature was decreased to -60 °C, and NIS (13.8 mg, 0.061 mmol) was added. After 1 h 45 min, reaction was quenched by dropwise addition of Et<sub>3</sub>N (2 µL) at -60 °C, and filtered. The filtrate was washed sequentially with saturated Na<sub>2</sub>S<sub>2</sub>O<sub>3</sub> solution (10 mL) and saturated NaHCO<sub>3</sub> solution (10 mL), dried over MgSO<sub>4</sub>, and filtered. Then silica (230-400 mesh size, 560 mg) was added to the crude in CH<sub>2</sub>Cl<sub>2</sub>, and dried by evaporation under rota vapor. The crude silica residue was washed sequentially with hexanes (30 mL, to remove Tol-S-S-Tol impurity) and

EtOAc (40 mL, to elute the crude product) using filter paper. EtOAc fraction was collected and concentrated by evaporation to yield the pale yellow crude tetrasaccharide oxazoline **9**.

*[4 + 2] glycosylation to synthesize hexasaccharide 10 (Step IV)*

A mixture of crude tetra oxazoline donor **9** and disaccharide acceptor **5** (59 mg, 0.056 mmol) was stirred with 3 Å molecular sieves (144 mg) in anhydrous CH<sub>2</sub>Cl<sub>2</sub> (1.11 mL) for 30 min at RT under N<sub>2</sub> atmosphere. After cooling the reaction mixture to -60 °C for 25 min, 10 µL of diluted TMSOTf (0.008 mmol) solution in CH<sub>2</sub>Cl<sub>2</sub> was then added, and reaction mixture was allowed to continuously stir at -60 °C. After 1 h, temperature was increased from -60 °C to -50 °C, and reaction was allowed to stir for another 1.5 h. Reaction was quenched by dropwise addition of Et<sub>3</sub>N (3 µL), diluted with CH<sub>2</sub>Cl<sub>2</sub> (5 mL), filtered, and washed with saturated NaHCO<sub>3</sub> solution (10 mL). CH<sub>2</sub>Cl<sub>2</sub> layer was collected, dried over MgSO<sub>4</sub>, filtered, and concentrated by evaporation to yield pale yellow crude that was subjected to column chromatography on silica gel with EtOAc/hexanes (1/4, v/v) to yield the pure hexasaccharide **10** (78.1 mg, 47% yield over 4 steps) as white amorphous foam.

*R*<sub>f</sub> 0.22 (EtOAc/hexanes = 1/3, v/v, run two times); [α]<sup>20</sup><sub>D</sub> -24.64 (*c* 1.38, CHCl<sub>3</sub>); <sup>1</sup>H NMR (500 MHz, CDCl<sub>3</sub>): δ 7.94 (d, *J* = 7.6 Hz, 2H, Ar-H), 7.92-7.87 (m, 4H, Ar-H), 7.70 (d, *J* = 7.7 Hz, 1H, Ar-H), 7.56-7.46 (m, 4H, Ar-H), 7.45-7.38 (m, 3H, Ar-H), 7.38-7.33 (m, 2H, Ar-H), 7.33-7.29 (m, 8H, Ar-H), 7.28-7.22 (m, 21H, Ar-H), 7.22-7.13 (m, 29H, Ar-H), 7.12-7.10 (m, 4H, Ar-H), 7.09-7.03 (m, 6H, Ar-H), 6.89 (d, *J* = 7.8 Hz, 2H, Ar-H), 6.76 (d, *J* = 7.4 Hz, 1H, N-H), 6.60 (d, *J* = 7.5 Hz, 1H, N-H), 6.55 (d, *J* = 7.6 Hz, 1H, N-H), 5.61 (t, *J* = 9.0 Hz, 1H, H-2'''''), 5.53-5.42 (m, 2H, H-2', H-2'''), 5.02 (d, *J* = 11.5 Hz, 1H, CH<sub>2</sub>Ph), 4.93-4.80 (m, 4H, H-1, 3xCH<sub>2</sub>Ph), 4.77-4.66 (m, 5H, H-1'', H-1'''''), CH<sub>2</sub> group of Nap, 2xCH<sub>2</sub>Ph), 4.63-4.15 (m, 25H, H-1', H-1''', H-1'''''), H-3, H-3'', H-3'''''), CH<sub>2</sub> group of Nap, 18xCH<sub>2</sub>Ph), 3.97-3.86 (m, 4H, H-3''', H-4', H-4''', H-4'''''), 3.83 (d, *J* = 10.2 Hz, 1H, H-3'), 3.74-3.31 (m, 22H, H-3'''''), H-4, H-4'', H-4'''''), H-5, H-5', H-5'', H-5''', H-5'''''), H-5'''''), H-6a, H-6b, H-6a', H-6b', H-6a'', H-6b'', H-6a''', H-6b''', H-6a'''''), H-6b'''''), 3.27-3.10 (m, 3H, H-2'', H-2, H-2'''''), 2.24 (s, 3H, PhCH<sub>3</sub>); <sup>13</sup>C NMR (125 MHz, CDCl<sub>3</sub>): δ 165.72 (C), 165.29 (C), 165.11 (C), 161.13 (C), 139.13 (C), 139.10 (C), 138.74 (C), 138.44 (C), 138.21 (C), 138.12 (C), 137.93 (C), 137.88 (C), 134.91 (C), 133.44 (CH), 133.19 (CH), 133.15 (C), 133.09 (C), 133.00 (CH), 130.03 (CH), 129.86 (C), 129.79 (CH), 128.96 (C), 128.76 (CH), 128.70 (CH), 128.60 (CH), 128.55 (CH), 128.47 (CH), 128.40 (CH), 128.34 (CH), 128.28 (CH), 128.19 (CH), 128.11 (CH), 128.04 (CH), 128.00 (CH), 127.93 (CH), 127.89 (CH), 127.82 (CH), 127.76 (CH), 127.68 (CH), 127.61 (CH), 127.47 (CH), 127.38 (CH), 126.88 (CH), 126.24 (CH), 126.12 (CH), 125.94 (CH), 100.58 (CH), 100.35 (CH), 100.16 (CH), 99.33 (CH), 99.27 (CH), 92.78 (C), 92.54 (C), 92.41 (C), 84.74 (CH), 79.48 (CH), 78.87 (CH), 77.47 (CH), 77.35 (CH), 76.85 (CH), 76.69 (CH), 76.30 (CH), 76.20 (CH), 75.99 (CH), 75.26 (CH), 75.15 (CH), 75.03 (CH<sub>2</sub>), 75.01 (CH<sub>2</sub>), 74.94 ((CH<sub>2</sub>), 74.91 (CH<sub>2</sub>), 74.86 (CH<sub>2</sub>), 74.21 (CH), 73.94 (CH), 73.80 (CH), 73.66 (CH<sub>2</sub>), 73.61 (CH<sub>2</sub>), 73.51 (CH<sub>2</sub>), 73.49 (CH<sub>2</sub>), 73.44 (CH<sub>2</sub>), 73.15 (CH), 72.80 (CH), 72.76 (CH), 72.09 (CH), 71.98 (CH<sub>2</sub>), 69.36 (CH<sub>2</sub>), 69.07 (CH<sub>2</sub>), 69.02 (CH<sub>2</sub>),

68.60 (CH<sub>2</sub>), 68.58 (CH<sub>2</sub>), 68.46 (CH<sub>2</sub>), 59.17 (CH), 59.06 (CH), 57.25 (CH), 21.27 (CH<sub>3</sub>); HRMS (ESI-TOF): *m/z* calcd for C<sub>165</sub>H<sub>160</sub>Cl<sub>9</sub>N<sub>3</sub>O<sub>33</sub>SNa [M + Na]<sup>+</sup>, 3086.7752; found, 3086.7692.

**2-Trichloromethyl-3-O-(2-O-benzoyl-4,6-di-O-benzyl-3-O-(naphthalen-2-ylmethyl)-β-D-galactopyranosyl)-(1→3)-(4,6-di-O-benzyl-2-deoxy-2-trichloroacetamido-β-D-glucopyranosyl)-(1→3)-(2-O-benzoyl-4,6-di-O-benzyl-β-D-galactopyranosyl)-(1→3)-(4,6-di-O-benzyl-2-deoxy-2-trichloroacetamido-β-D-glucopyranosyl)-(1→3)-(2-O-benzoyl-4,6-di-O-benzyl-β-D-galactopyranosyl)-4,6-di-O-benzyl-1,2-dideoxy-α-D-glucopyrano-[2,1-d]-2-oxazoline (11).**

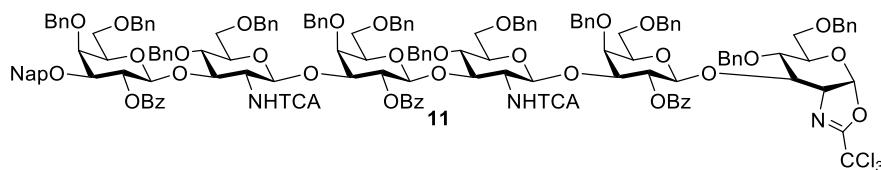

The crude reaction mixture (from Table S6) was subjected to column chromatography on silica gel with EtOAc/hexanes (1/5 to 1/3, v/v) to yield the pure hexasaccharide oxazoline **11** as white amorphous foam. *R<sub>f</sub>* 0.32 (EtOAc/toluene = 1/8, v/v, run two times); [α]<sup>20</sup><sub>D</sub> -20.7 (*c* 1.74, CHCl<sub>3</sub>); <sup>1</sup>H NMR (500 MHz, CDCl<sub>3</sub>): δ 7.96-7.92 (m, 3H, Ar-H), 7.92-7.89 (m, 3H, Ar-H), 7.71 (d, *J* = 7.8 Hz, 1H, Ar-H), 7.55 (d, *J* = 8.0 Hz, 1H, Ar-H), 7.53-7.50 (m, 2H, Ar-H), 7.50-7.46 (m, 1H, Ar-H), 7.45-7.42 (m, 1H, Ar-H), 7.42-7.38 (m, 3H, Ar-H), 7.38-7.34 (m, 3H, Ar-H), 7.34-7.30 (m, 6H, Ar-H), 7.29-7.28 (m, 5H, Ar-H), 7.28-7.26 (m, 6H, Ar-H), 7.26-7.24 (m, 13H, Ar-H), 7.23-7.22 (m, 2H, Ar-H), 7.22-7.21 (m, 1H, Ar-H), 7.21-7.19 (m, 3H, Ar-H), 7.19-7.18 (m, 5H, Ar-H), 7.18-7.17 (m, 2H, Ar-H), 7.17-7.14 (m, 8H, Ar-H), 7.14-7.13 (m, 4H, Ar-H), 7.13-7.11 (m, 3H, Ar-H), 7.11-7.10 (m, 2H, Ar-H), 7.08-7.07 (m, 1H, Ar-H), 7.07-7.03 (m, 3H, Ar-H), 6.59 (d, *J* = 7.6 Hz, 1H, N-H), 6.49 (d, *J* = 7.9 Hz, 1H, N-H), 5.65-5.58 (m, 2H, H-1, H-2'''''), 5.49-5.39 (m, 2H, H-2', H-2'''), 5.02 (d, *J* = 11.4 Hz, 1H, CH<sub>2</sub>Ph), 4.89 (d, *J* = 10.3 Hz, 1H, CH<sub>2</sub>Ph), 4.86 (d, *J* = 10.4 Hz, 1H, CH<sub>2</sub>Ph), 4.77 (d, *J* = 8.0 Hz, 1H, H-1''), 4.75-4.67 (m, 4H, H-1'''''), CH<sub>2</sub> group of Nap, 2xCH<sub>2</sub>Ph), 4.64-4.23 (m, 25H, H-1', H-1''', H-1''''', H-3, H-3'', H-3'''''), CH<sub>2</sub> group of Nap, 18xCH<sub>2</sub>Ph), 4.17 (d, *J* = 11.8 Hz, 1H, CH<sub>2</sub>Ph), 4.04 (dd, *J* = 7.1, 1.8 Hz, 1H, H-2), 3.97-3.92 (m, 3H, H-3', H-4', H-4'''''), 3.91-3.88 (m, 1H, H-4'''), 3.84 (dd, *J* = 10.3, 2.5 Hz, 1H, H-3'''), 3.71-3.31 (m, 22H, H-3''''', H-4, H-4'', H-4''''', H-5, H-5', H-5'', H-5''', H-5''''', H-5''''', H-5''''', H-6a, H-6b, H-6a', H-6b', H-6a'', H-6b'', H-6a''', H-6b''', H-6a''''', H-6b''''', H-6a''''', H-6b'''''), 3.21-3.14 (m, 1H, H-2'''''), 3.10-3.02 (m, 1H, H-2''); <sup>13</sup>C NMR (125 MHz, CDCl<sub>3</sub>): δ 165.72 (C), 165.30 (C), 164.92 (C), 162.88 (C), 161.23 (C), 161.11 (C), 139.18 (C), 138.92 (C), 138.78 (C), 138.23 (C), 138.19 (C), 138.16 (C), 137.99 (C), 137.93 (C), 137.85 (C), 134.95 (C), 133.63 (CH), 133.56 (CH), 133.22 (CH), 133.18 (C), 133.11 (C), 130.03 (CH), 129.90 (CH), 128.82 (CH), 128.79 (CH), 128.71 (CH), 128.63 (CH), 128.58 (CH), 128.55 (CH), 128.50 (CH), 128.42 (CH), 128.33 (CH), 128.28 (CH), 128.24 (CH), 128.20 (CH), 128.12 (CH), 128.08 (CH), 128.02 (CH), 127.99 (CH), 127.91 (CH), 127.84 (CH), 127.78 (CH), 127.75 (CH), 127.70 (CH), 127.63 (CH), 127.40 (CH), 126.90 (CH), 126.26 (CH), 126.13 (CH), 125.96 (CH), 104.18 (CH), 100.97 (CH),

100.53 (CH), 100.24 (CH), 99.26 (CH), 92.48 (C), 92.41 (C), 86.48 (C), 79.50 (CH), 78.04 (CH), 77.46 (CH), 76.87 (CH), 76.46 (CH), 76.38 (CH), 76.28 (CH), 76.23 (CH), 75.48 (CH), 75.18 (CH), 75.16 (CH), 75.09 (CH<sub>2</sub>), 74.96 (CH<sub>2</sub>), 74.90 (CH<sub>2</sub>), 74.67 (CH), 74.16 (CH), 73.92 (CH), 73.78 (CH), 73.69 (CH<sub>2</sub>), 73.64 (CH<sub>2</sub>), 73.61 (CH<sub>2</sub>), 73.52 (CH<sub>2</sub>), 73.47 (CH<sub>2</sub>), 73.34 (CH<sub>2</sub>), 73.14 (CH), 72.82 (CH), 72.46 (CH), 72.12 (CH), 71.98 (CH<sub>2</sub>), 71.65 (CH<sub>2</sub>), 71.24 (CH), 69.75 (CH<sub>2</sub>), 69.41 (CH<sub>2</sub>), 69.03 (CH<sub>2</sub>), 68.91 (CH<sub>2</sub>), 68.42 (CH<sub>2</sub>), 68.37 (CH<sub>2</sub>), 66.29 (CH), 59.42 (CH), 59.18 (CH); HRMS (ESI-TOF): *m/z* calcd for C<sub>158</sub>H<sub>153</sub>Cl<sub>9</sub>N<sub>3</sub>O<sub>33</sub> [M + H]<sup>+</sup>, 2940.7586; found, 2940.7446.

### Synthesis of octasaccharide **12** by [2 + 2 + 2 + 2] iterative glycosylation (Scheme 3)

**4-Methylphenyl (2-*O*-benzoyl-4,6-di-*O*-benzyl-3-*O*-(naphthalen-2-ylmethyl)- $\beta$ -D-galactopyranosyl)-(1 $\rightarrow$ 3)-(4,6-di-*O*-benzyl-2-deoxy-2-trichloroacetamido- $\beta$ -D-glucopyranosyl)-(1 $\rightarrow$ 3)-(2-*O*-benzoyl-4,6-di-*O*-benzyl- $\beta$ -D-galactopyranosyl)-(1 $\rightarrow$ 3)-(4,6-di-*O*-benzyl-2-deoxy-2-trichloroacetamido- $\beta$ -D-glucopyranosyl)-(1 $\rightarrow$ 3)-(2-*O*-benzoyl-4,6-di-*O*-benzyl- $\beta$ -D-galactopyranosyl)-(1 $\rightarrow$ 3)-(4,6-di-*O*-benzyl-2-deoxy-2-trichloroacetamido- $\beta$ -D-glucopyranosyl)-(1 $\rightarrow$ 3)-(2-*O*-benzoyl-4,6-di-*O*-benzyl- $\beta$ -D-galactopyranosyl)-(1 $\rightarrow$ 3)-4,6-di-*O*-benzyl-2-deoxy-2-trichloroacetamido-1-thio- $\beta$ -D-glucopyranoside (**12**).**

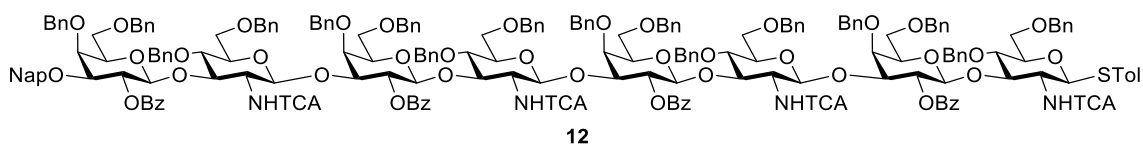

#### Synthesis of disaccharide oxazoline **2** (Step I)

A solution of compound **1** (100 mg, 0.084 mmol) in dry CH<sub>2</sub>Cl<sub>2</sub> (1.39 mL) was stirred with 3 Å powdered molecular sieves (200 mg) at RT under N<sub>2</sub> for 30 min. NIS (22.54 mg, 0.10 mmol) and TMSOTf (3.02  $\mu$ L, 0.017 mmol) were sequentially added to the reaction mixture after cooling to -50 °C. The reaction was quenched after 15 min by dropwise addition of Et<sub>3</sub>N (6  $\mu$ L) at -50 °C, diluted with CH<sub>2</sub>Cl<sub>2</sub> (10 mL), and filtered. The filtrate was washed sequentially with saturated Na<sub>2</sub>S<sub>2</sub>O<sub>3</sub> solution (10 mL) and saturated NaHCO<sub>3</sub> solution (10 mL), dried over MgSO<sub>4</sub>, and filtered. Then silica (230-400 mesh size, 400 mg) was added to the crude in CH<sub>2</sub>Cl<sub>2</sub>, and dried by evaporation under rota vapor. The crude silica residue was washed sequentially with hexanes (50 mL, to remove Tol-S-S-Tol impurity) and EtOAc (60 mL, to elute the crude product) using filter paper. EtOAc fraction was collected and concentrated by evaporation to yield the pale yellow crude disaccharide oxazoline **2**.

#### [2 + 2] glycosylation and synthesis of tetrasaccharide oxazoline **9** (Steps II & III)



A mixture of crude oxazoline **2** and acceptor **5** (73.6 mg, 0.0696 mmol) was stirred with 3 Å molecular sieves (174 mg) in anhydrous CH<sub>2</sub>Cl<sub>2</sub> (1.39 mL) for 30 min at RT under N<sub>2</sub> atmosphere. After cooling the reaction mixture to -50 °C, TMSOTf (1.26 µL, 0.007 mmol) was added. After stirring for 2 h 10 min, temperature was decreased to -60 °C, and NIS (17.22 mg, 0.077 mmol) was added. After 1 h 45 min, reaction was quenched by dropwise addition of Et<sub>3</sub>N (2.6 µL) at -60 °C, and filtered. The filtrate was washed sequentially with saturated Na<sub>2</sub>S<sub>2</sub>O<sub>3</sub> solution (10 mL) and saturated NaHCO<sub>3</sub> solution (10 mL), dried over MgSO<sub>4</sub>, and filtered. Then silica (230-400 mesh size, 696 mg) was added to the crude in CH<sub>2</sub>Cl<sub>2</sub>, and dried by evaporation under rota vapor. The crude silica residue was washed sequentially with hexanes (50 mL, to remove Tol-S-S-Tol impurity) and EtOAc (60 mL, to elute the crude product) using filter paper. EtOAc fraction was collected and concentrated by evaporation to yield the pale yellow crude tetrasaccharide oxazoline **9**.

*[4 + 2] glycosylation and synthesis of hexasaccharide oxazoline 11 (Steps IV and V)*

A mixture of crude tetra oxazoline donor **9** and disaccharide acceptor **5** (73.6 mg, 0.0696 mmol) was stirred with 3 Å molecular sieves (180 mg) in anhydrous CH<sub>2</sub>Cl<sub>2</sub> (1.39 mL) for 30 min at RT under N<sub>2</sub> atmosphere. After cooling the reaction mixture to -60 °C for about 25 min, 10 µL of diluted TMSOTf (0.0097 mmol) solution in CH<sub>2</sub>Cl<sub>2</sub> was then added, and reaction mixture was allowed to continuously stir at -60 °C. After 1 h, temperature was increased from -60 °C to -50 °C, and reaction was allowed to stir for another 1.5 h. NIS (15.7 mg, 0.0696 mmol) was then added, and reaction was stirred for another 1 h. Reaction was quenched by dropwise addition of Et<sub>3</sub>N (3.6 µL), diluted with CH<sub>2</sub>Cl<sub>2</sub> (10 mL), and filtered. The filtrate was washed sequentially with saturated Na<sub>2</sub>S<sub>2</sub>O<sub>3</sub> solution (10 mL) and saturated NaHCO<sub>3</sub> solution (10 mL), dried over MgSO<sub>4</sub>, and filtered. Then silica (230-400 mesh size, 1 g) was added to the crude in CH<sub>2</sub>Cl<sub>2</sub>, and dried by evaporation under rota vapor. The crude silica residue was washed sequentially with hexanes (50 mL, to remove Tol-S-S-Tol impurity) and EtOAc (60 mL, to elute the crude product) using filter paper. EtOAc fraction was collected and concentrated by evaporation to yield the pale yellow crude hexasaccharide oxazoline **11**.

*[6 + 2] glycosylation to synthesize type I LacNAc thioglycoside octasaccharide 12 (Step VI)*

A mixture of crude hexasaccharide oxazoline donor **11** and disaccharide acceptor **5** (73.6 mg, 0.0696 mmol) was stirred with 3 Å molecular sieves (154 mg) in anhydrous CH<sub>2</sub>Cl<sub>2</sub> (1.39 mL) for 30 min at RT under N<sub>2</sub> atmosphere. After cooling the reaction mixture to -60 °C for about 25 min, 10 µL of diluted TMSOTf (0.0055 mmol) solution in CH<sub>2</sub>Cl<sub>2</sub> was then added, and reaction mixture was allowed to continuously stir at -60 °C. After 1 h, temperature was increased from -60 °C to -50 °C, and reaction was allowed to stir for another 1 h before raising the temperature to -40 °C. After 3.5 h, another aliquot of TMSOTf (0.0055 mmol) was added, and reaction was continuously stirred for 2 h more. Reaction was quenched by dropwise addition of Et<sub>3</sub>N (4 µL), diluted with CH<sub>2</sub>Cl<sub>2</sub> (10 mL), filtered, and washed with saturated NaHCO<sub>3</sub> solution (10 mL). CH<sub>2</sub>Cl<sub>2</sub> layer was



Tetrasaccharide donor **8** (60 mg, 0.028 mmol) was stirred with 3 Å molecular sieves (120 mg) in anhydrous CH<sub>2</sub>Cl<sub>2</sub> (470 µL) at RT for 30 min. After cooling the reaction mixture to -60 °C, NIS (7.6 mg, 0.034 mmol) was added, and followed by the addition of TMSOTf (0.51 µL, 0.0028 mmol). After 1.5 h, reaction was quenched by dropwise addition of Et<sub>3</sub>N (2 µL), diluted with CH<sub>2</sub>Cl<sub>2</sub> (5 mL), and filtered. The filtrate was washed sequentially with saturated Na<sub>2</sub>S<sub>2</sub>O<sub>3</sub> solution (10 mL) and saturated NaHCO<sub>3</sub> solution (10 mL), dried over MgSO<sub>4</sub>, filtered, and concentrated by evaporation to yield the crude tetrasaccharide oxazoline **9** as yellow foam.

Crude tetrasaccharide oxazoline **9** and acceptor **14**<sup>1</sup> (31 mg, 0.0256 mmol) were dried together under high vacuum. Added 3 Å molecular sieves (91 mg) and CH<sub>2</sub>Cl<sub>2</sub> (512 µL), and stirred at RT under N<sub>2</sub> for 30 min. After cooling the reaction mixture to -60 °C, TMSOTf (0.93 µL, 0.0051 mmol) was added. After 1.5 h, temperature was raised to -50 °C. Then after stirring for more 2 h, reaction was quenched by dropwise addition of Et<sub>3</sub>N, diluted with CH<sub>2</sub>Cl<sub>2</sub> (5 mL), and filtered. The filtrate was washed with saturated NaHCO<sub>3</sub> solution (10 mL), dried over MgSO<sub>4</sub>, filtered, and concentrated by evaporation to yield the pale-yellow residue that was purified by column chromatography on silica gel with EtOAc/hexanes (1/4, v/v) to yield pure hexasaccharide **15**<sup>1</sup> (53 mg, 65% over two steps) as white amorphous foam. *R<sub>f</sub>* 0.17 (EtOAc/hexanes = 1/3, v/v). Spectroscopic data were identical to those reported previously.<sup>1</sup>

## Reference

1. Verma, N.; Tu, Z.; Lu, M.-S.; Liu, S.-H.; Renata, S.; Phang, R.; Liu, P.-K.; Ghosh, B.; Lin, C.-H., *J. Org. Chem.* **2021**, *86*, 892-916.

### III. NMR Spectra

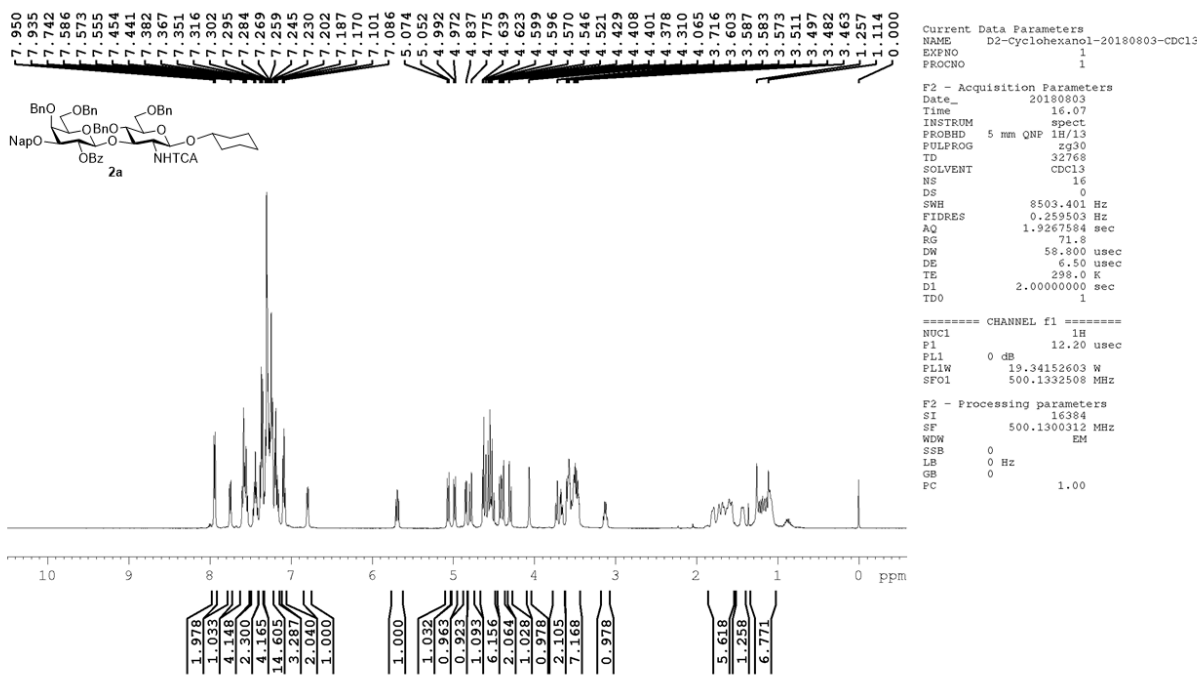

<sup>1</sup>H NMR spectrum of compound 2a (500 MHz, CDCl<sub>3</sub>)

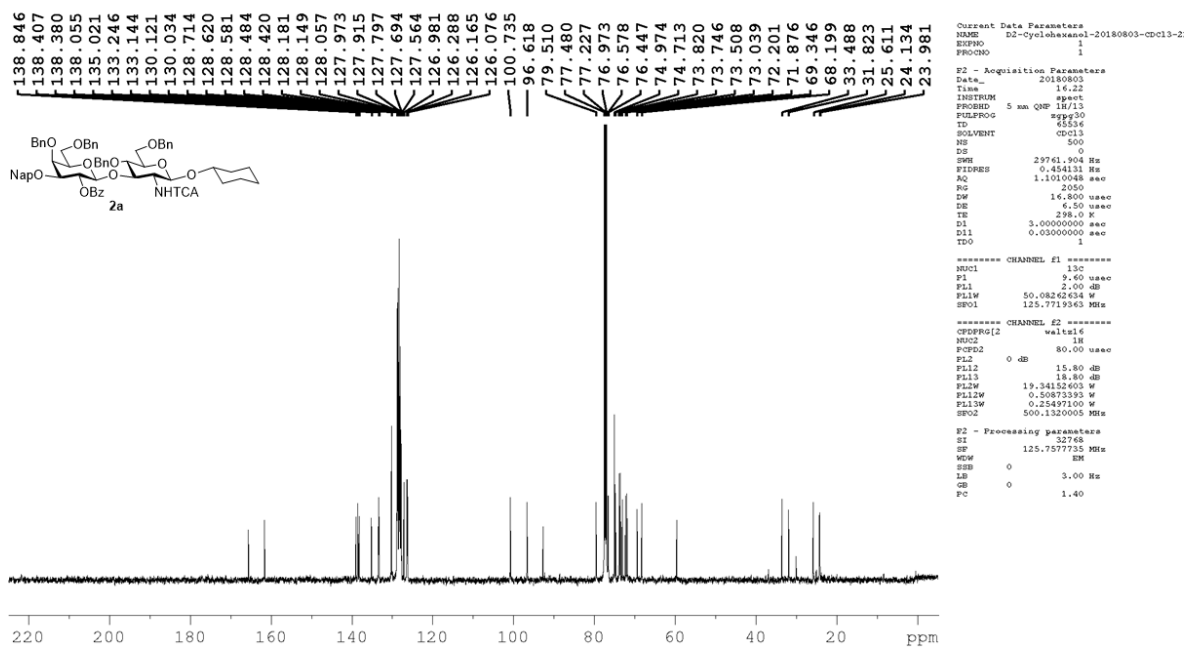

<sup>13</sup>C NMR spectrum of compound 2a (125 MHz, CDCl<sub>3</sub>)

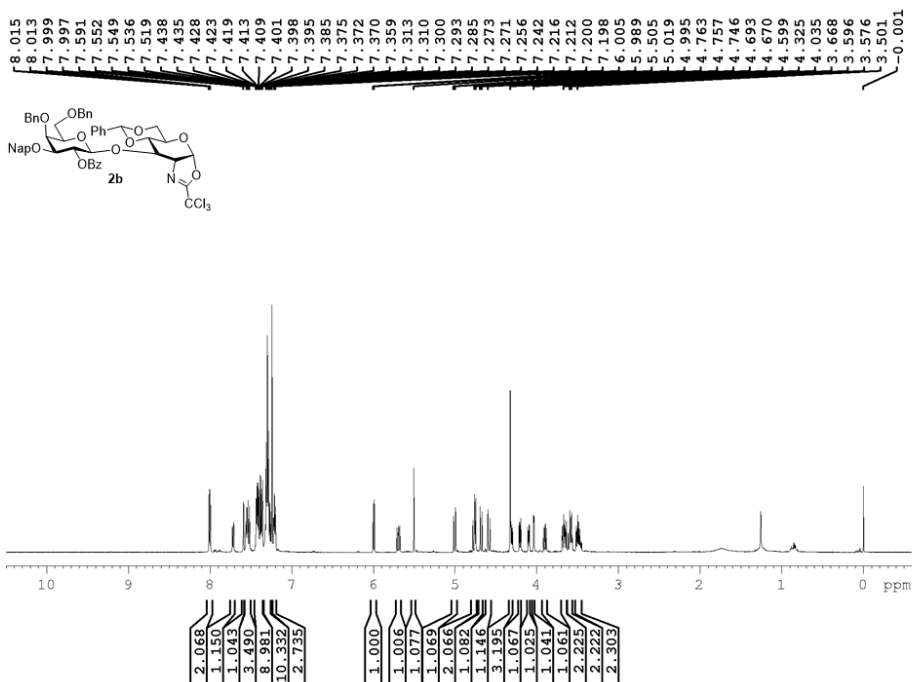

```

Current Data Parameters
NAME      20140618-oxazolone 1
EXPNO    1
PROCNO   1

F2 - Acquisition Parameters
Date_    20140618
Time     9.38
INSTRUM spect
PROBHD   5 mm QNP 1H/13
PULPROG zg30
TD       32768
SOLVENT  CDCl3
NS       16
DS       0
SWH      8503.401 Hz
FIDRES   0.259503 Hz
AQ       1.9267584 sec
RG       203
DW       58.800 usec
DE       6.50 usec
TE       298.0 K
D1       2.00000000 sec
TDO      1

===== CHANNEL f1 =====
NUC1     1H
P1       12.20 usec
PL1      0 dB
PL1W     19.34152603 W
SFO1     500.1332508 MHz

F2 - Processing parameters
SI       16384
SF       500.1300221 MHz
WDW      EM
SFB      0
LB       0 Hz
GB       0
PC       1.00
  
```

<sup>1</sup>H NMR spectrum of compound **2b** (500 MHz, CDCl<sub>3</sub>)

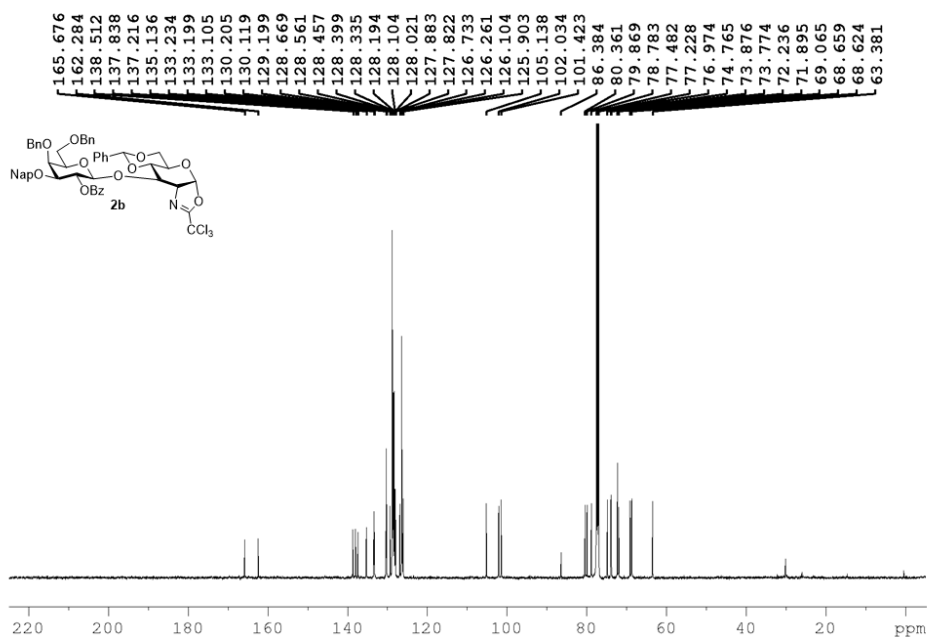

```

Current Data Parameters
NAME      20140618-oxazolone 1-2d(13C)
EXPNO    2
PROCNO   1

F2 - Acquisition Parameters
Date_    20140617
Time     2.29
INSTRUM spect
PROBHD   5 mm QNP 1H/13
PULPROG zgpg30
TD       65536
SOLVENT  CDCl3
NS       7000
DS       0
SWH      29761.904 Hz
FIDRES   0.434121 Hz
AQ       1.1010048 sec
RG       2050
DW       16.800 usec
DE       6.50 usec
TE       298.0 K
D1       3.00000000 sec
D11      0.03000000 sec
TDO      1

===== CHANNEL f1 =====
NUC1     13C
P1       9.60 usec
PL1      2.00 dB
PL1W     50.08262634 W
SFO1     125.7719363 MHz

===== CHANNEL f2 =====
CDPPG[2]  waitz16
NUC2     1H
PCPD2    80.00 usec
PL2      0 dB
PL12     15.80 dB
PL13     18.80 dB
PL1W     19.34152603 W
PL12W    0.50873393 W
PL13W    0.25497100 W
SFO2     500.1320005 MHz

F2 - Processing parameters
SI       32768
SF       125.7577690 MHz
WDW      EM
SFB      0
LB       3.00 Hz
GB       0
PC       1.40
  
```

<sup>13</sup>C NMR spectrum of compound **2b** (125 MHz, CDCl<sub>3</sub>)

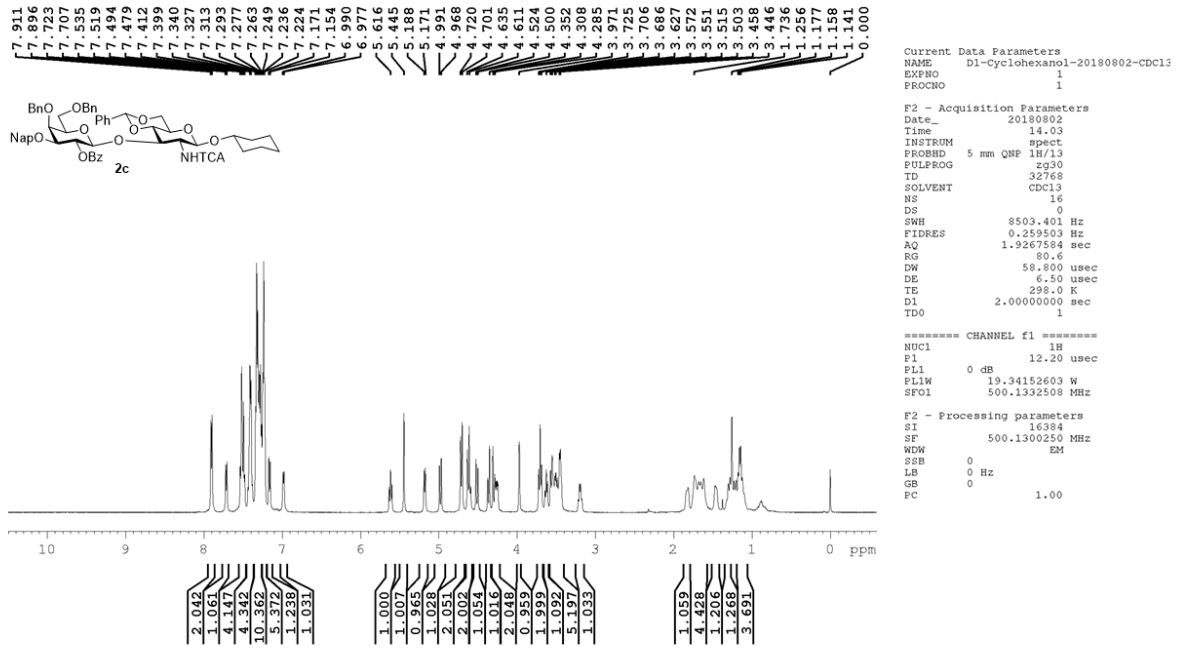

<sup>1</sup>H NMR spectrum of compound **2c** (500 MHz, CDCl<sub>3</sub>)

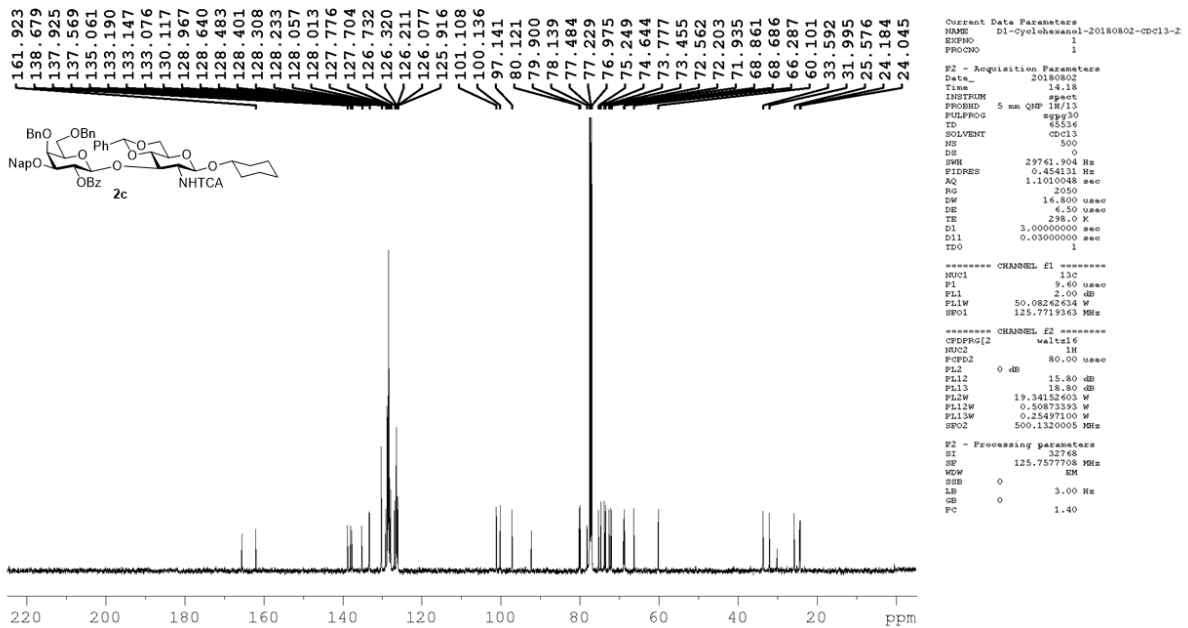

<sup>13</sup>C NMR spectrum of compound **2c** (125 MHz, CDCl<sub>3</sub>)

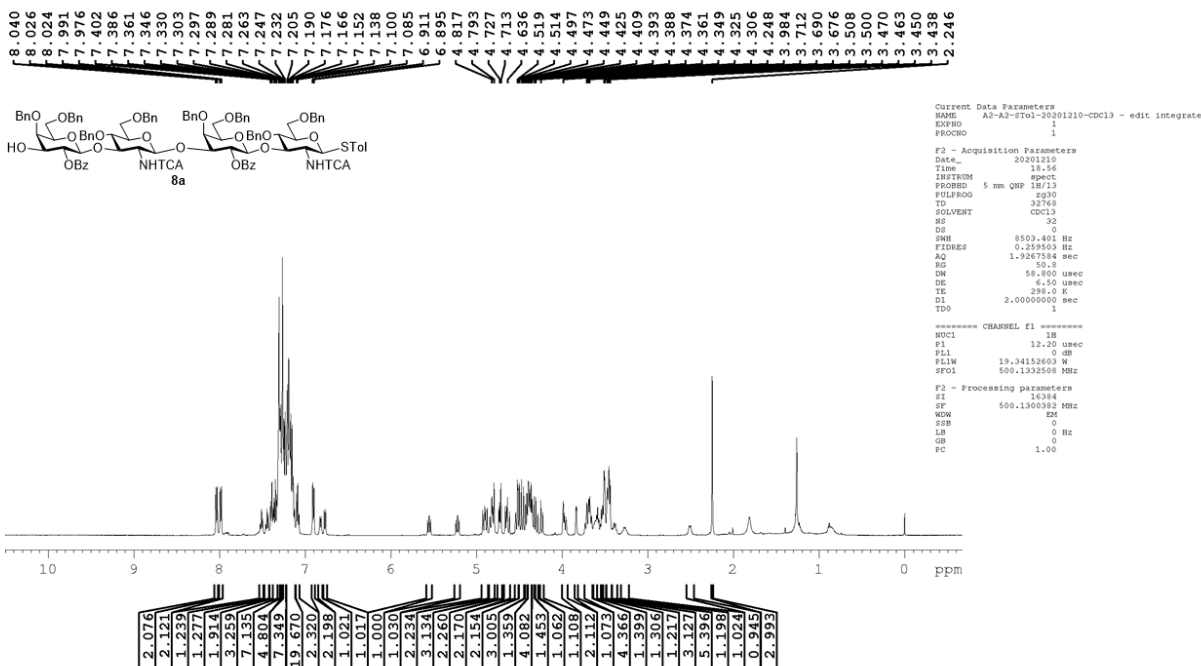

<sup>1</sup>H NMR spectrum of compound **8a** (500 MHz, CDCl<sub>3</sub>)

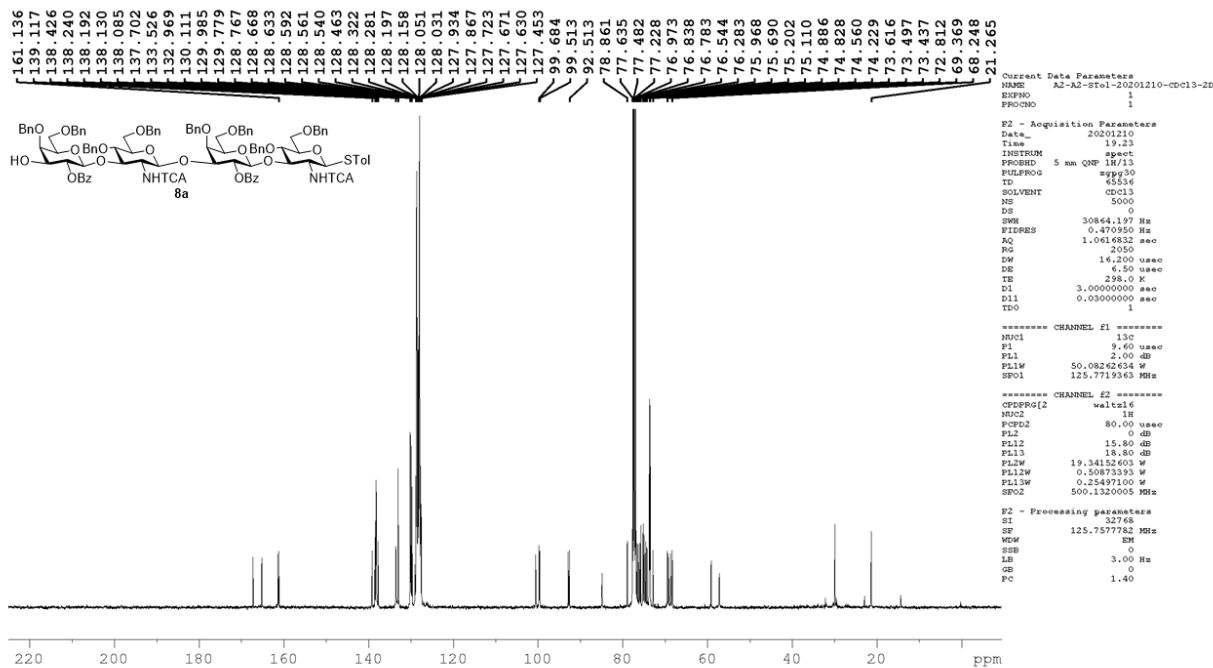

<sup>13</sup>C NMR spectrum of compound **8a** (125 MHz, CDCl<sub>3</sub>)





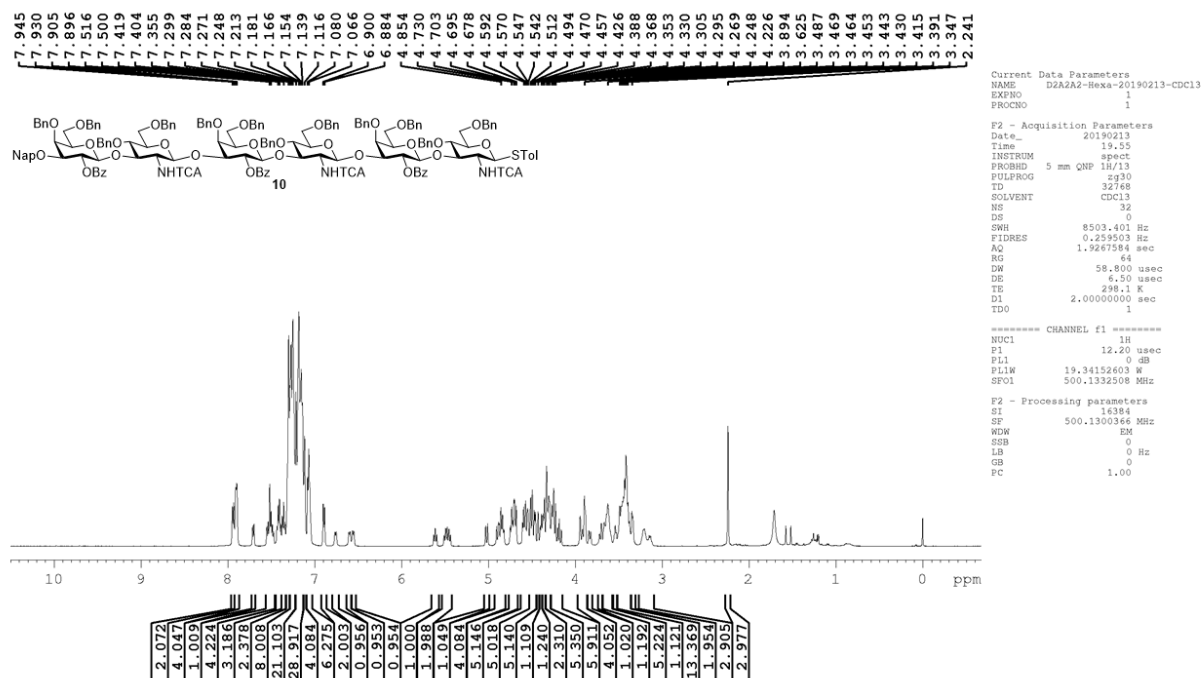

<sup>1</sup>H NMR spectrum of compound **10** (500 MHz, CDCl<sub>3</sub>)

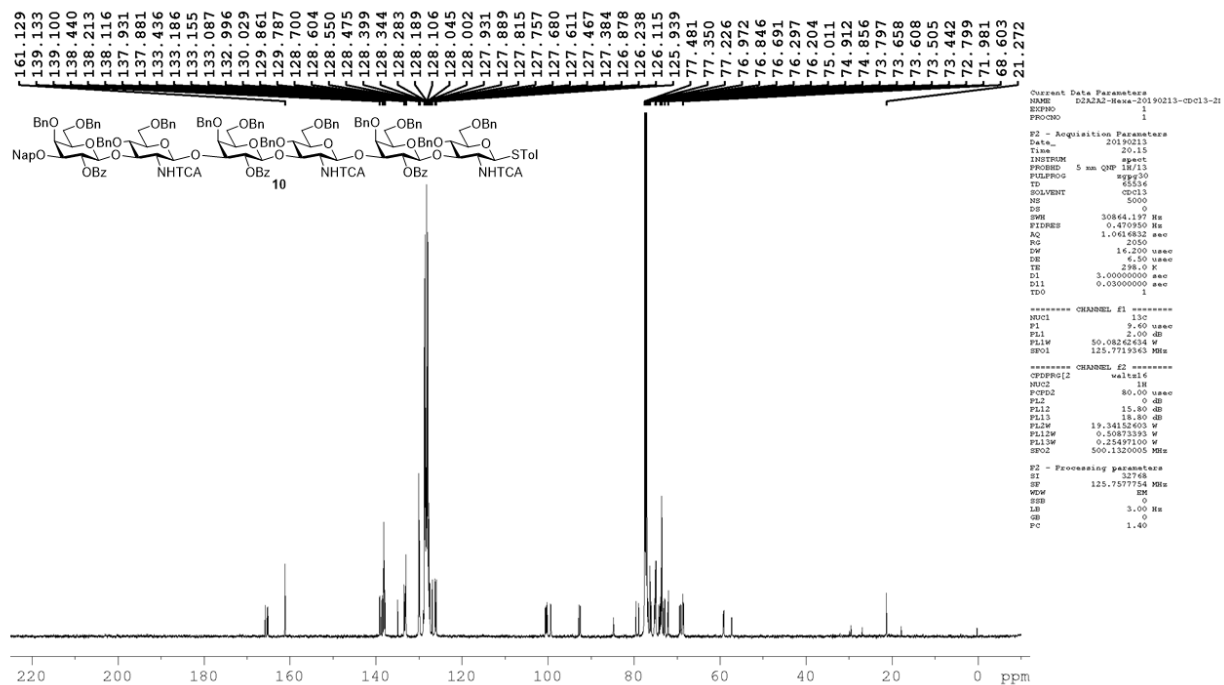

<sup>13</sup>C NMR spectrum of compound **10** (125 MHz, CDCl<sub>3</sub>)

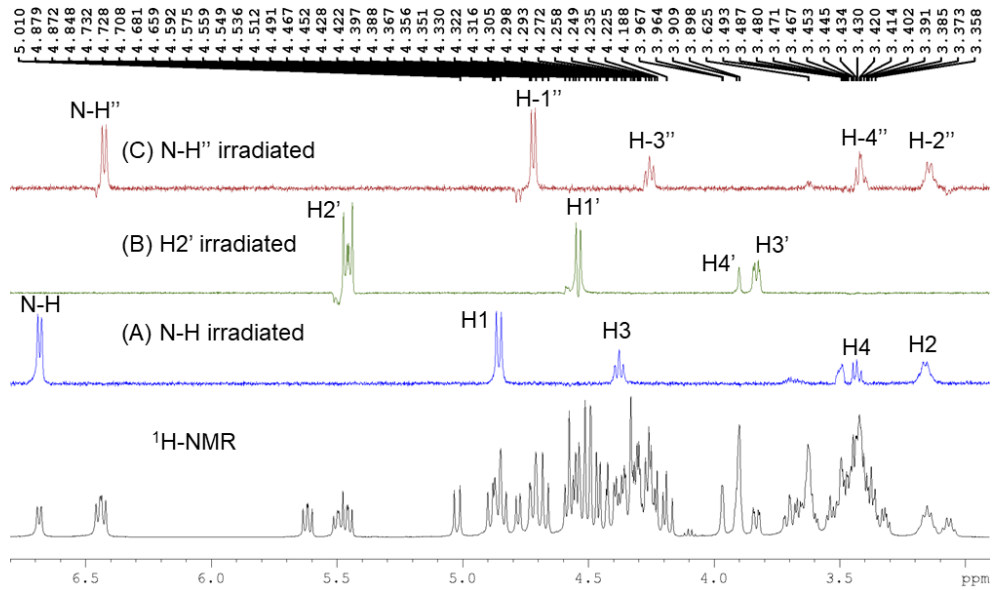

1D-Selective TOCSY NMR spectrum of compound **10** (500 MHz, CDCl<sub>3</sub>)

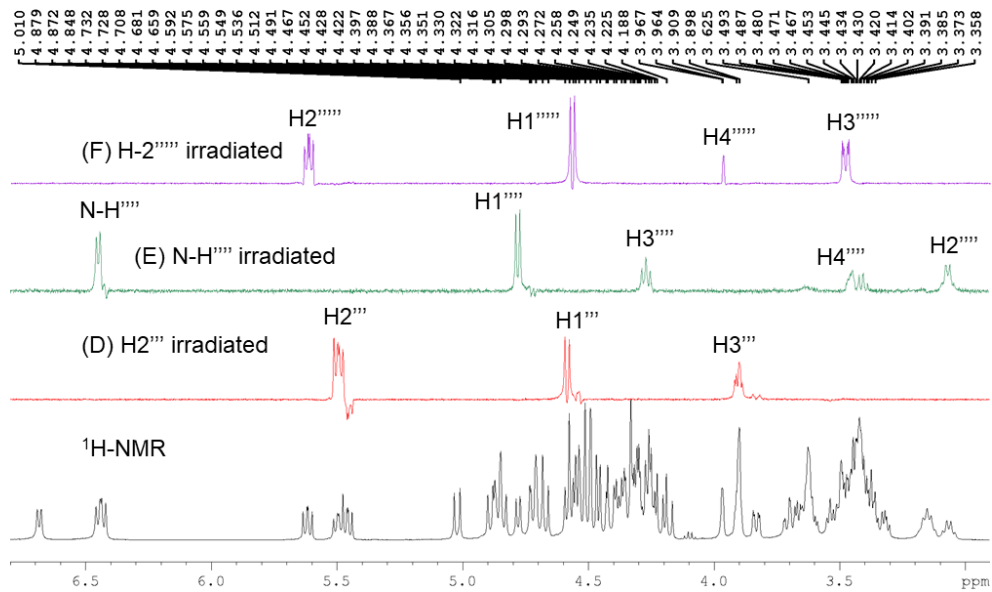

1D-Selective TOCSY NMR spectrum of compound **10** (500 MHz, CDCl<sub>3</sub>)

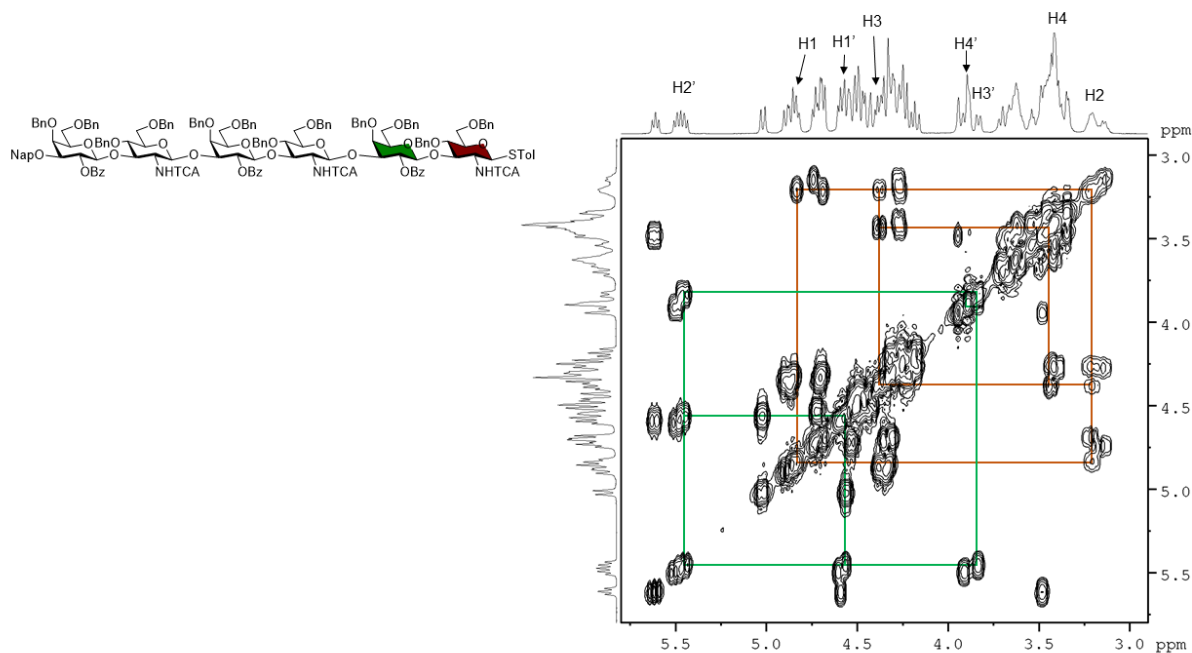

$^1\text{H}$ - $^1\text{H}$  2D COSY NMR spectrum of compound **10** (500 MHz,  $\text{CDCl}_3$ )

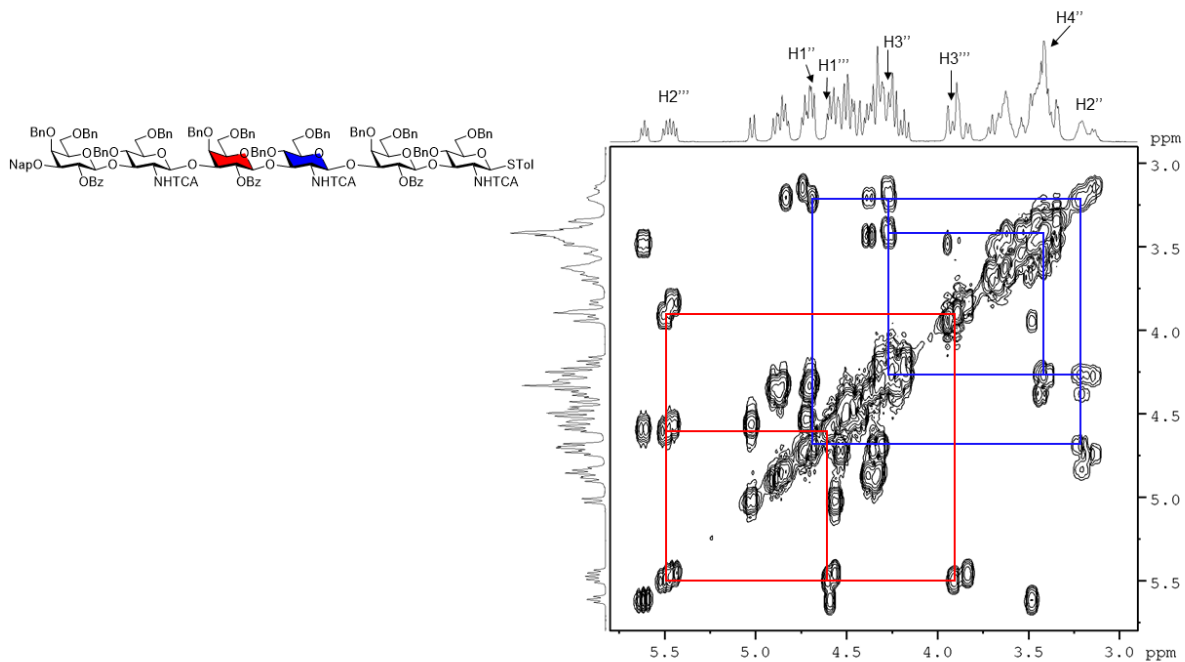

$^1\text{H}$ - $^1\text{H}$  2D COSY NMR spectrum of compound **10** (500 MHz,  $\text{CDCl}_3$ )

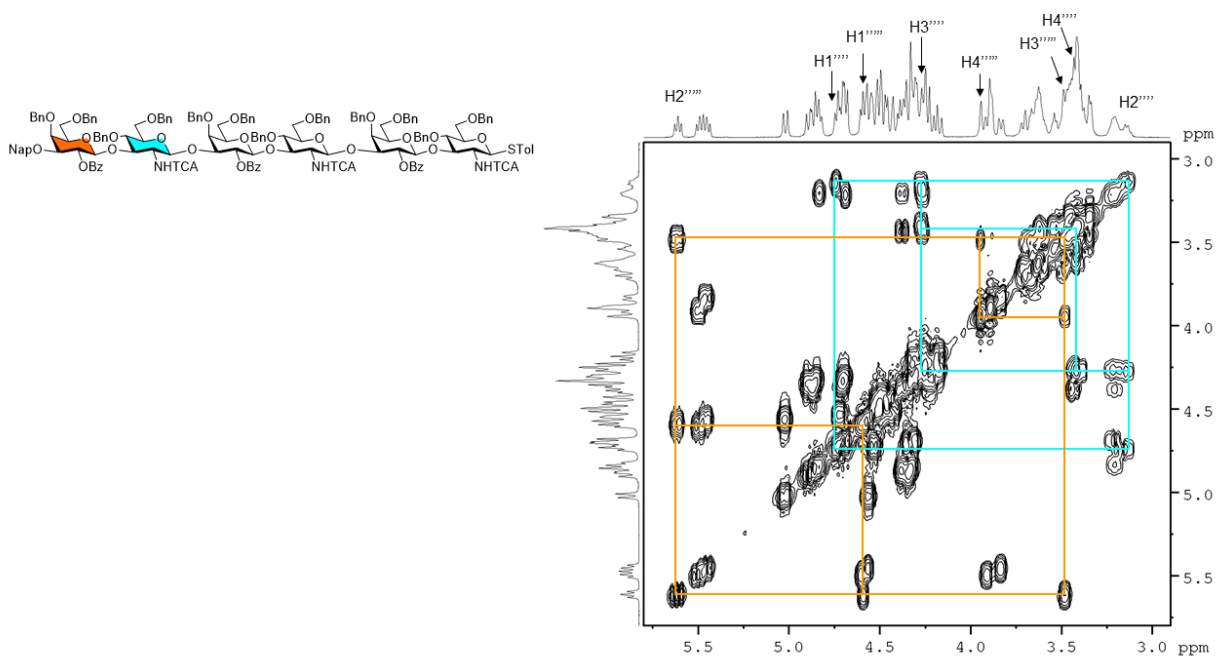

$^1\text{H}$ - $^1\text{H}$  2D COSY NMR spectrum of compound **10** (500 MHz,  $\text{CDCl}_3$ )

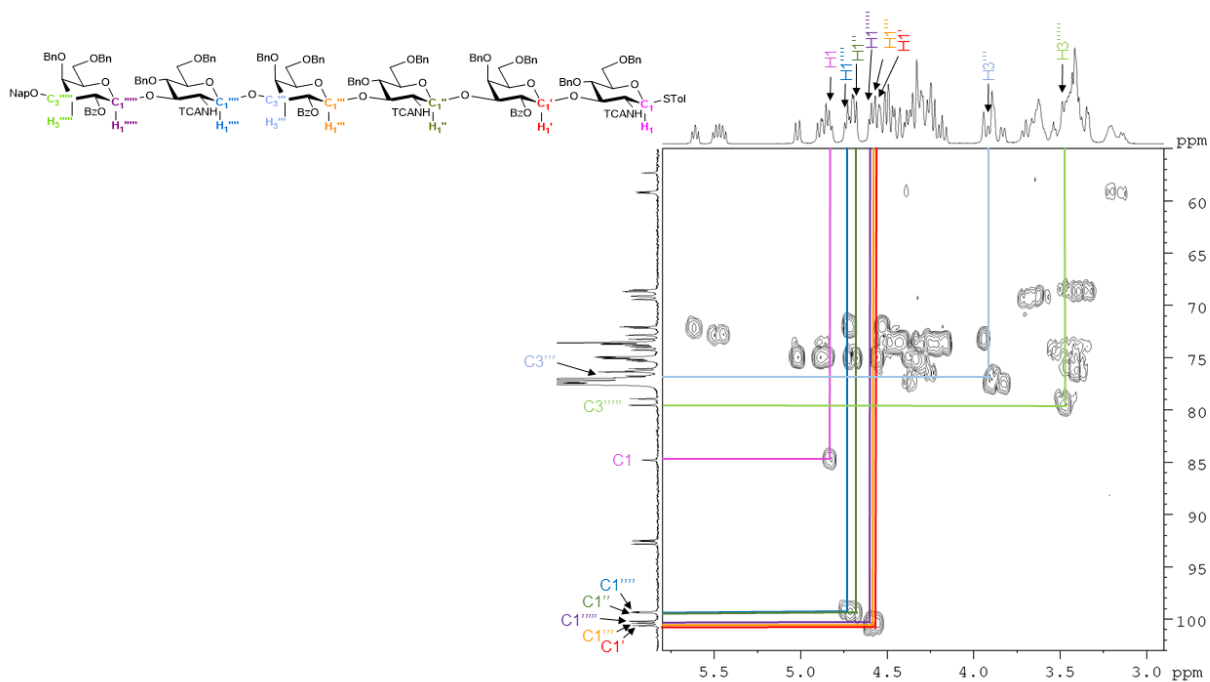

$^1\text{H}$ - $^{13}\text{C}$  2D HMQC NMR spectrum of compound **10** (500/125 MHz,  $\text{CDCl}_3$ ) showing the selective correlations to identify the C1 of Gal and GlcNTCA residues.

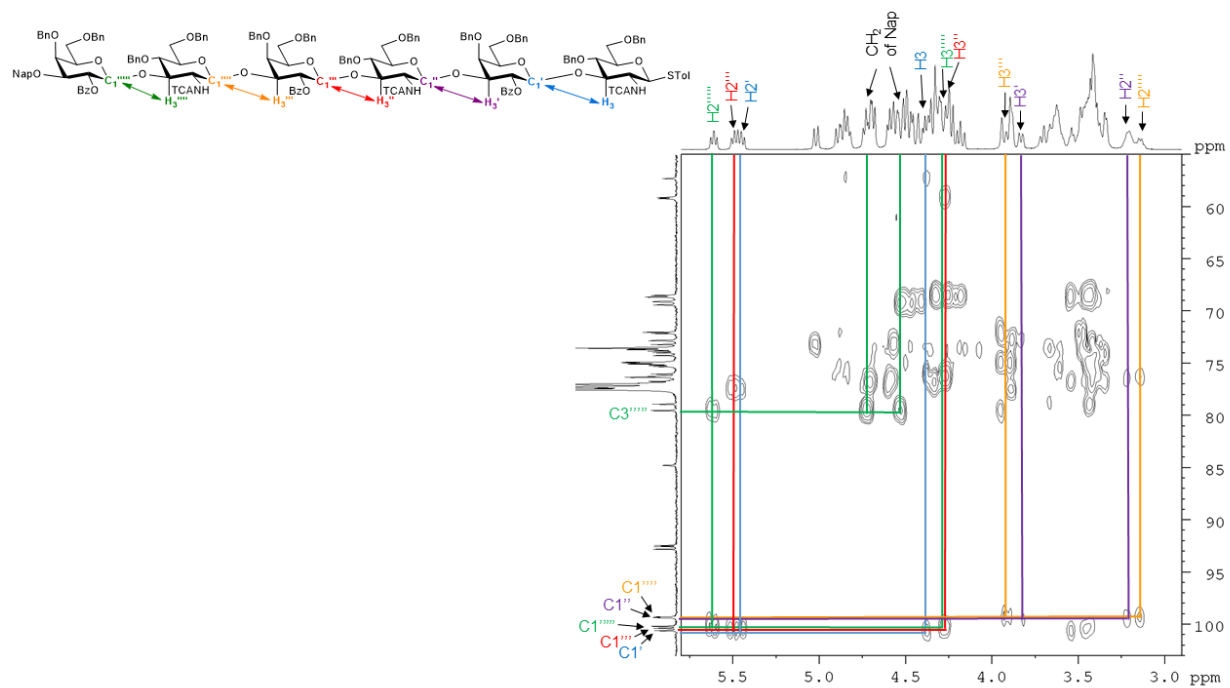

$^1\text{H}$ - $^{13}\text{C}$  2D HMBC NMR spectrum of compound **10** (500/125 MHz,  $\text{CDCl}_3$ ) showing the selective correlations to identify the  $\beta$  1-3 linkages.

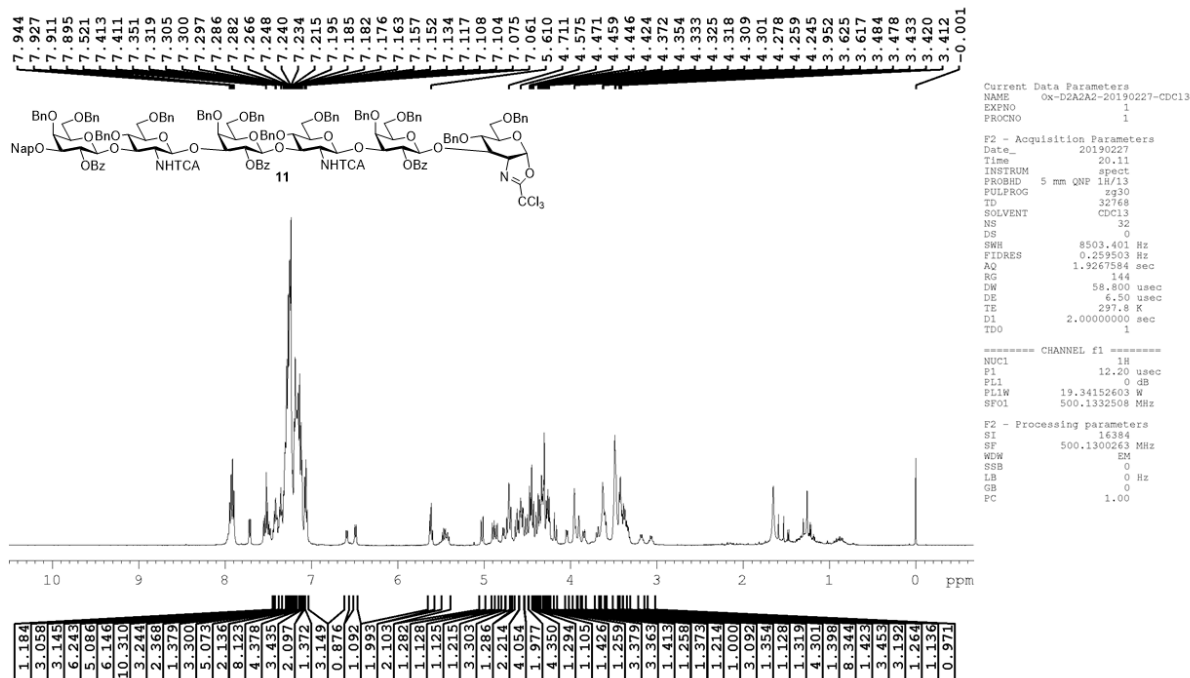

<sup>1</sup>H NMR spectrum of compound **11** (500 MHz, CDCl<sub>3</sub>)

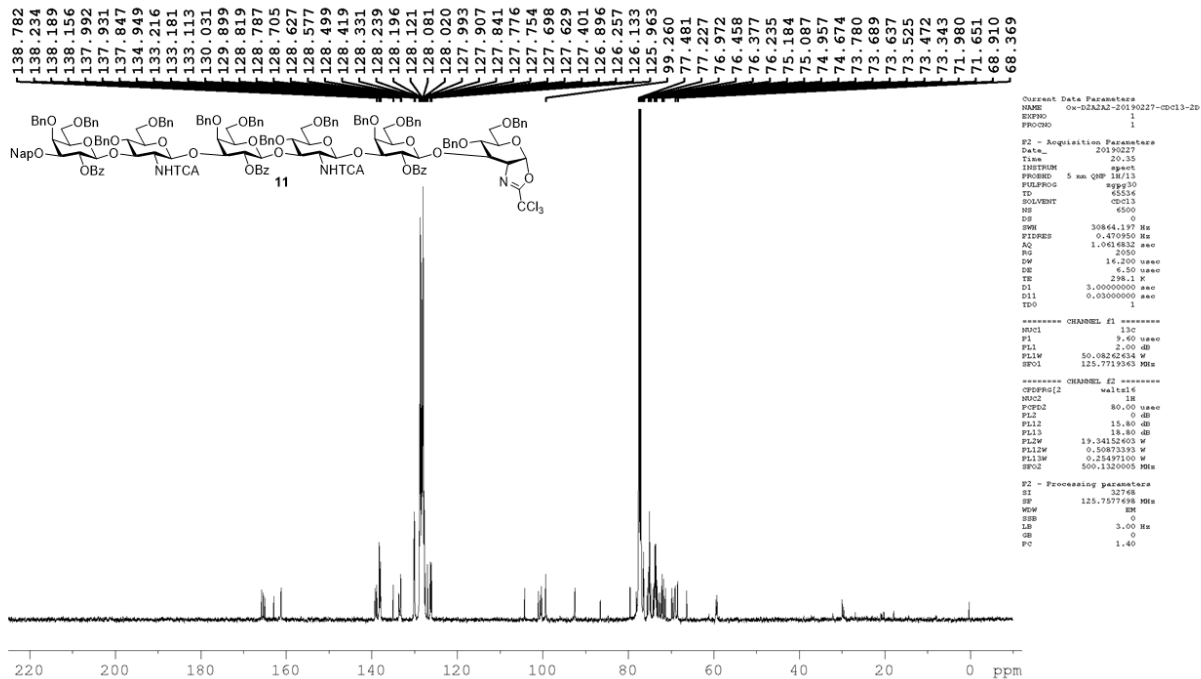

<sup>13</sup>C NMR spectrum of compound **11** (125 MHz, CDCl<sub>3</sub>)

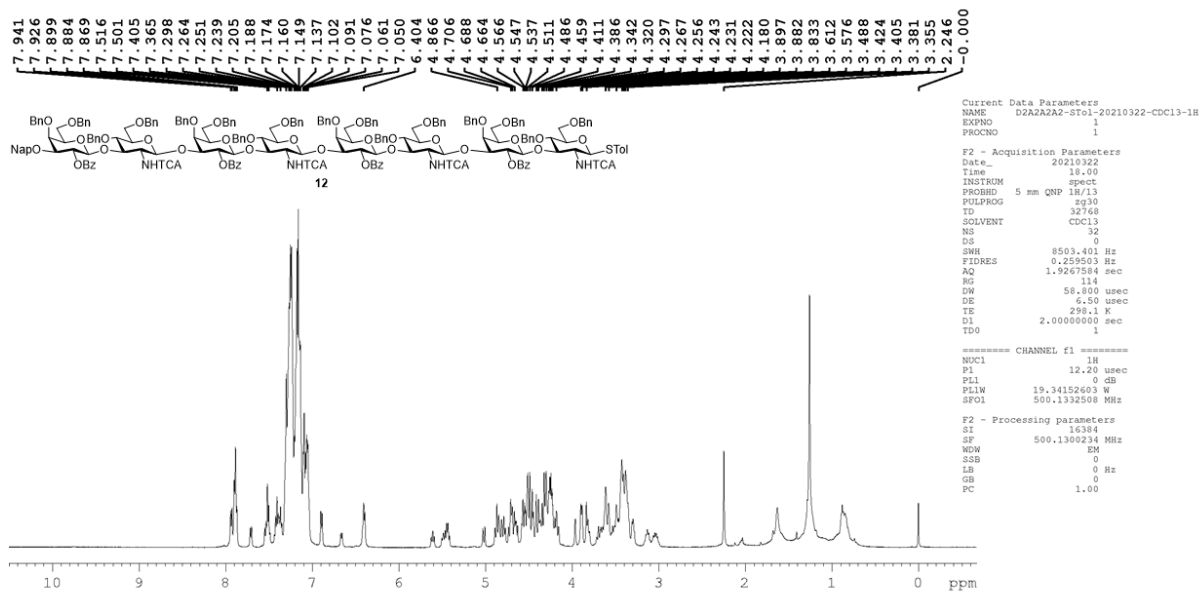

<sup>1</sup>H NMR spectrum of compound **12** (500 MHz, CDCl<sub>3</sub>)

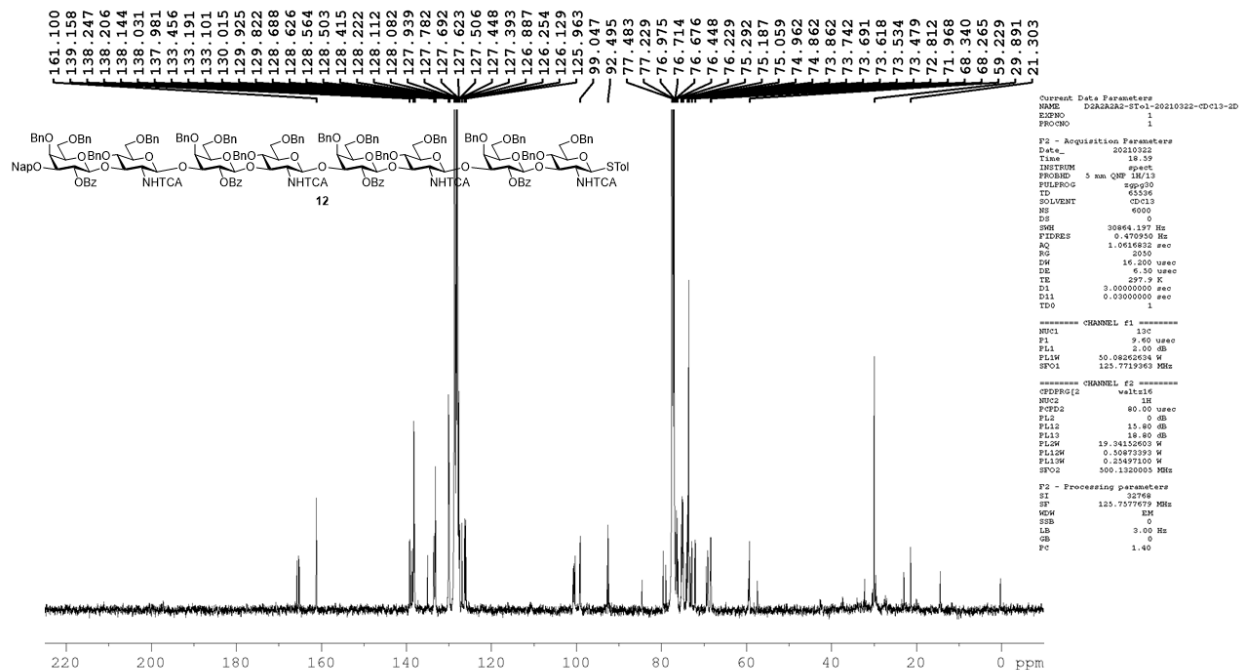

<sup>13</sup>C NMR spectrum of compound **12** (125 MHz, CDCl<sub>3</sub>)

**<sup>1</sup>H-<sup>1</sup>H COSY**

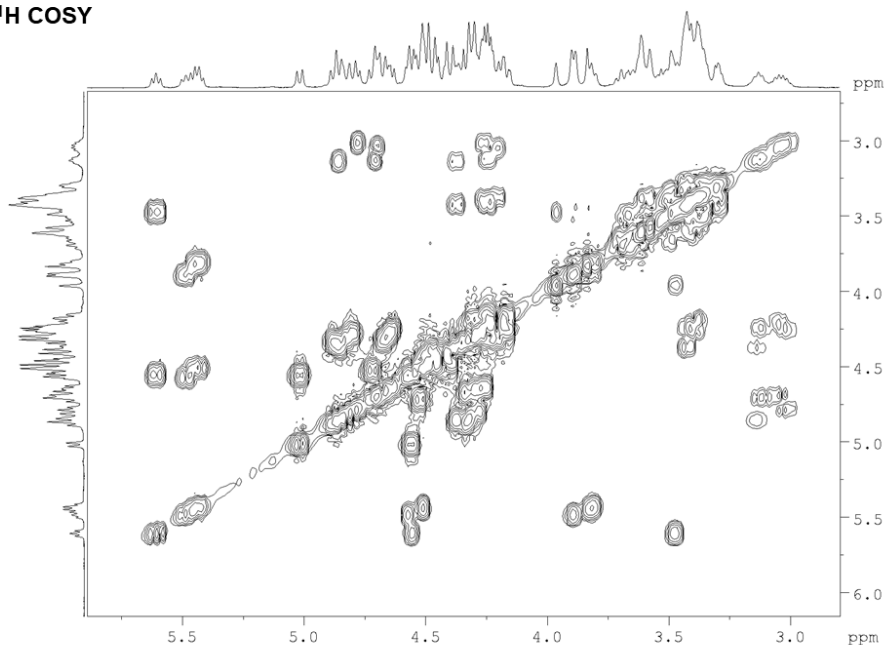

```
Current Data Parameters
NAME D2A2A2-Std-20210322-CDCl3-2D
EXPNO 4
PROCNO 1

F2 - Acquisition Parameters
Date_ 20210323
Time 7:02
INSTRUM spect
PROBHD 5 mm QNP 1H/13
PULPROG zgpg30
TD 256
SOLVENT cdcl3
NS 8
DS 16
SWH 6684.492 Hz
FIDRES 0.203952 Hz
AQ 0.1531904 sec
RG 144
DE 6.30 usec
TE 298.15 K
D0 0.0000000 sec
D1 1.0000000 sec
D11 0.0300000 sec
D12 0.0000000 sec
D13 0.0000000 sec
D16 0.0000000 sec
D18 0.0000000 sec
D19 0.0001490 sec
RG 0.0001490 sec

===== CHANNEL f1 =====
NUC1 1H
P1 12.20 usec
PL1 0 dB
PL12 0 dB
PL1W 19.2415200 W
PL1Z 0.0001934 W
SFO1 500.1330094 MHz

===== GRADIENT CHANNEL =====
GPM1[1] SINE.100
GPM1[2] SINE.100
GPE1 50.00 %
GPE2 50.00 %
GPE3 100.00 usec

F1 - Acquisition parameters
TD 256
SFO1 500.1330094 MHz
FIDRES 0.203952 Hz
AQ 0.1531904 sec
RG 144
DE 6.30 usec
TE 298.15 K
D0 0.0000000 sec
D1 1.0000000 sec
D11 0.0300000 sec
D12 0.0000000 sec
D13 0.0000000 sec
D16 0.0000000 sec
D18 0.0000000 sec
D19 0.0001490 sec
RG 0.0001490 sec

F2 - Processing parameters
SI 1024
SF 500.1300234 MHz
WDW QF
SSB 0
LB 0 Hz
GB 0
PC 1.40

F1 - Processing parameters
SI 1024
SF 500.1300234 MHz
WDW QF
SSB 0
LB 0 Hz
GB 0
```

**<sup>1</sup>H-<sup>1</sup>H 2D COSY NMR spectrum of compound 12 (500 MHz, CDCl<sub>3</sub>)**

**<sup>1</sup>H-<sup>13</sup>C HMQC**

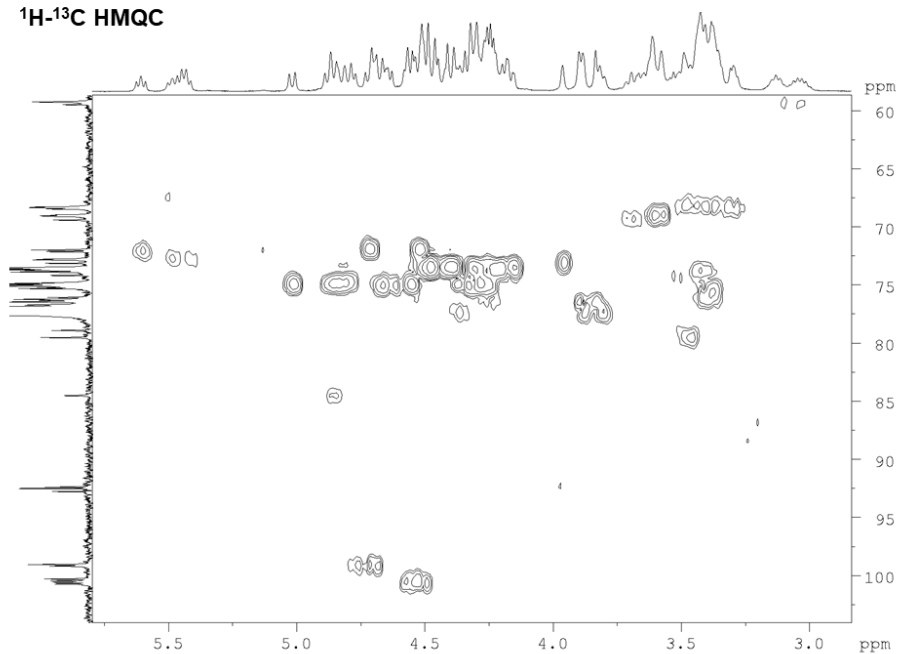

```
Current Data Parameters
NAME D2A2A2-Std-20210322-CDCl3-2D
EXPNO 4
PROCNO 1

F2 - Acquisition Parameters
Date_ 20210323
Time 8:01
INSTRUM spect
PROBHD 5 mm QNP 1H/13
PULPROG zgpg30
TD 256
SOLVENT cdcl3
NS 8
DS 16
SWH 6664.667 Hz
FIDRES 0.252308 Hz
AQ 0.1534000 sec
RG 144
DE 6.30 usec
TE 298.15 K
D0 0.0000000 sec
D1 1.5000000 sec
D11 0.0000000 sec
D12 0.0000000 sec
D13 0.0000000 sec
D16 0.0000000 sec
D18 0.0000000 sec
D19 0.0000000 sec
RG 0.0000000 sec

===== CHANNEL f1 =====
NUC1 1H
P1 12.20 usec
PL1 0 dB
PL12 0 dB
PL1W 19.2415200 W
PL1Z 0.0001934 W
SFO1 500.1330094 MHz

===== CHANNEL f2 =====
CPDPRG2 waltz16
NUC2 13C
P2 10.00 usec
PL2 0 dB
PL21 0 dB
PL22 0 dB
PL2W 50.0828280 W
PL2Z 1.5837518 W
SFO2 125.7615483 MHz

===== GRADIENT CHANNEL =====
GPM1[1] SINE.100
GPM1[2] SINE.100
GPM1[3] SINE.100
GPE1 50.00 %
GPE2 50.00 %
GPE3 40.10 %
GPE4 100.00 usec

F1 - Acquisition parameters
TD 256
SFO1 500.1330094 MHz
FIDRES 0.252308 Hz
AQ 0.1534000 sec
RG 144
DE 6.30 usec
TE 298.15 K
D0 0.0000000 sec
D1 1.5000000 sec
D11 0.0000000 sec
D12 0.0000000 sec
D13 0.0000000 sec
D16 0.0000000 sec
D18 0.0000000 sec
D19 0.0000000 sec
RG 0.0000000 sec

F2 - Processing parameters
SI 1024
SF 500.1300234 MHz
WDW QF
SSB 0
LB 0 Hz
GB 0
PC 1.40

F1 - Processing parameters
SI 1024
SF 500.1300234 MHz
WDW QF
SSB 0
LB 0 Hz
GB 0
```

**<sup>1</sup>H-<sup>13</sup>C 2D HMQC NMR spectrum of compound 12 (500/125 MHz, CDCl<sub>3</sub>)**



<sup>1</sup>H-<sup>13</sup>C HMBC

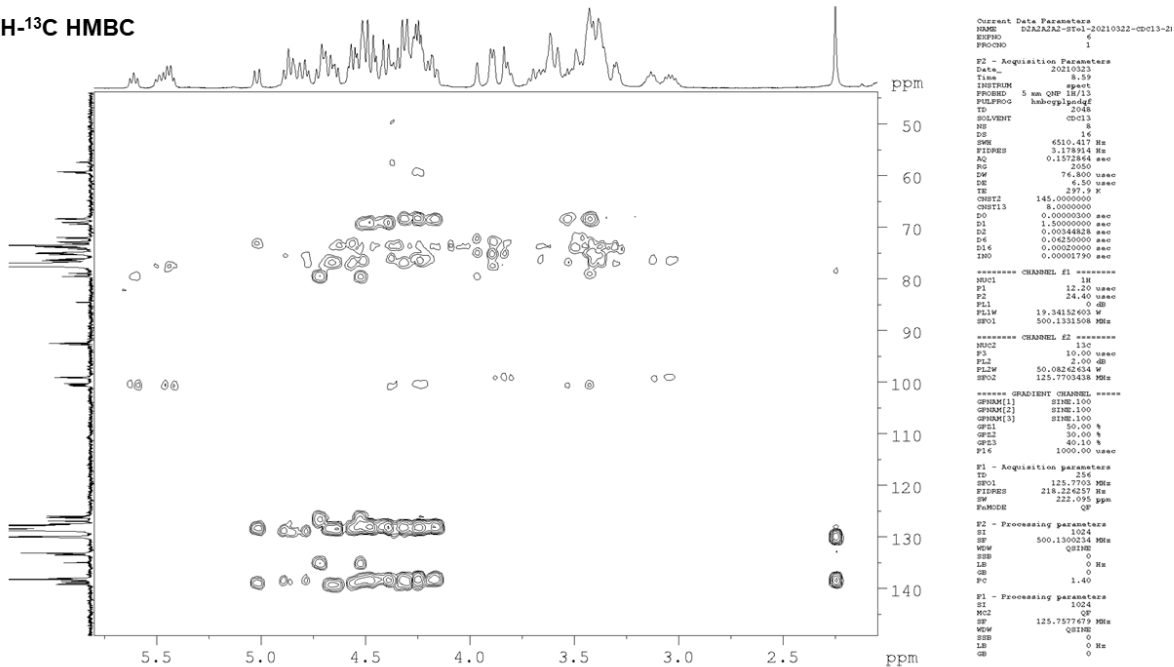

<sup>1</sup>H-<sup>13</sup>C 2D HMBC NMR spectrum of compound **12** (500/125 MHz, CDCl<sub>3</sub>)
